# Supplementary material for: Long-Term Follow-Up of Gemogenovatucel-T (Vigil) Survival and Molecular Signals of Immune Response in Recurrent Ovarian Cancer
Source: Vaccines (Basel). 2021 Aug 12;9(8):894. doi: 10.3390/vaccines9080894 (PMC8402348; doi:10.3390/vaccines9080894)
Supplement: Supplementary file 1 [file vaccines-09-00894-s001.zip › vaccines-1279453 after proof non publ.pdf]

Supplemental File 2. Table S2. Gene Expression Analysis

|               | Log2 fold change | std error (log2) | Lower confidence limit (log2) |
|---------------|------------------|------------------|-------------------------------|
| CXCL9-mRNA    | 5.77             | 0.625            | 4.55                          |
| NKG7-mRNA     | 3.84             | 0.453            | 2.96                          |
| CD8A-mRNA     | 3.53             | 0.495            | 2.56                          |
| GZMA-mRNA     | 3.62             | 0.511            | 2.62                          |
| CCL5-mRNA     | 3.53             | 0.549            | 2.46                          |
| GBP4-mRNA     | 3.82             | 0.598            | 2.65                          |
| IFNG-mRNA     | 4.18             | 0.676            | 2.85                          |
| CTSW-mRNA     | 3.57             | 0.625            | 2.34                          |
| CXCL13-mRNA   | 4.92             | 0.865            | 3.22                          |
| IER3-mRNA     | 2.18             | 0.387            | 1.42                          |
| IL2RB-mRNA    | 4.22             | 0.751            | 2.75                          |
| LYZ-mRNA      | 2.78             | 0.496            | 1.8                           |
| RUNX3-mRNA    | 2.19             | 0.4              | 1.41                          |
| KLRK1-mRNA    | 3.97             | 0.731            | 2.53                          |
| GIMAP4-mRNA   | 3.26             | 0.602            | 2.08                          |
| KLRB1-mRNA    | 3.38             | 0.628            | 2.15                          |
| CCR5-mRNA     | 3.08             | 0.578            | 1.94                          |
| SAMSN1-mRNA   | 2.53             | 0.48             | 1.59                          |
| CXCR6-mRNA    | 4.47             | 0.858            | 2.79                          |
| KLRD1-mRNA    | 4.44             | 0.862            | 2.75                          |
| GIMAP6-mRNA   | 4.34             | 0.843            | 2.69                          |
| CD3D-mRNA     | 3.47             | 0.677            | 2.14                          |
| PDCD1LG2-mRNA | 3.79             | 0.745            | 2.33                          |
| TLR4-mRNA     | 3.07             | 0.605            | 1.88                          |
| GBP1-mRNA     | 2.59             | 0.519            | 1.58                          |
| BAX-mRNA      | 1.54             | 0.308            | 0.932                         |
| C1QB-mRNA     | 3.51             | 0.707            | 2.13                          |
| IL10RA-mRNA   | 2.69             | 0.547            | 1.62                          |
| IL2RG-mRNA    | 3.39             | 0.689            | 2.04                          |
| GZMH-mRNA     | 4.16             | 0.849            | 2.5                           |
| CD96-mRNA     | 3.44             | 0.703            | 2.06                          |
| TYMP-mRNA     | 2.57             | 0.526            | 1.53                          |
| CXCL10-mRNA   | 3.68             | 0.757            | 2.2                           |
| IL32-mRNA     | 2.57             | 0.53             | 1.53                          |
| CD2-mRNA      | 2.92             | 0.607            | 1.73                          |
| ITGAL-mRNA    | 3.27             | 0.684            | 1.93                          |
| HCK-mRNA      | 2.67             | 0.558            | 1.57                          |
| CTLA4-mRNA    | 3.77             | 0.797            | 2.2                           |
| LY96-mRNA     | 2.34             | 0.497            | 1.37                          |
| CXCL11-mRNA   | 4.39             | 0.934            | 2.56                          |
| FASLG-mRNA    | 3.75             | 0.8              | 2.18                          |
| CTSS-mRNA     | 2.13             | 0.457            | 1.24                          |
| JAK2-mRNA     | 2.22             | 0.476            | 1.28                          |
| CYBB-mRNA     | 2.7              | 0.581            | 1.56                          |
| GZMK-mRNA     | 3.54             | 0.762            | 2.05                          |
| PIK3CG-mRNA   | 2.83             | 0.61             | 1.64                          |

|               |       |       |       |
|---------------|-------|-------|-------|
| CD3G-mRNA     | 4.16  | 0.897 | 2.4   |
| LAG3-mRNA     | 4.35  | 0.938 | 2.51  |
| IRF4-mRNA     | 4.39  | 0.956 | 2.51  |
| PTPRC-mRNA    | 2.69  | 0.586 | 1.54  |
| TNFRSF9-mRNA  | 3.04  | 0.665 | 1.73  |
| RAD51C-mRNA   | -1.51 | 0.331 | -2.15 |
| LILRB2-mRNA   | 3.03  | 0.671 | 1.71  |
| ITGAX-mRNA    | 2.12  | 0.471 | 1.19  |
| PFKM-mRNA     | -1.51 | 0.337 | -2.17 |
| C1QA-mRNA     | 2.98  | 0.667 | 1.68  |
| CD38-mRNA     | 4.31  | 0.971 | 2.4   |
| CD45RO-mRNA   | 2.5   | 0.564 | 1.39  |
| CCL2-mRNA     | 1.89  | 0.427 | 1.06  |
| STAT1-mRNA    | 2.06  | 0.466 | 1.15  |
| ZEB2-mRNA     | 2.19  | 0.495 | 1.21  |
| DAB2-mRNA     | 2.14  | 0.486 | 1.19  |
| LCK-mRNA      | 3.17  | 0.724 | 1.75  |
| ENTPD1-mRNA   | 2.34  | 0.548 | 1.27  |
| CCND2-mRNA    | 2.29  | 0.535 | 1.24  |
| FCN1-mRNA     | 2.41  | 0.568 | 1.29  |
| CASP1-mRNA    | 2.36  | 0.559 | 1.27  |
| CD68-mRNA     | 2.26  | 0.537 | 1.21  |
| PECAM1-mRNA   | 2.23  | 0.533 | 1.19  |
| TNFRSF1B-mRNA | 2.49  | 0.595 | 1.32  |
| CLECL1-mRNA   | 3.32  | 0.8   | 1.75  |
| FPR3-mRNA     | 2.48  | 0.598 | 1.31  |
| GLUL-mRNA     | 1.2   | 0.294 | 0.624 |
| LILRB4-mRNA   | 2.56  | 0.63  | 1.32  |
| B2M-mRNA      | 1.99  | 0.492 | 1.02  |
| ICOS-mRNA     | 3.79  | 0.94  | 1.95  |
| FCGR1A-mRNA   | 2.38  | 0.593 | 1.22  |
| IRF8-mRNA     | 2.9   | 0.724 | 1.48  |
| CD84-mRNA     | 2.26  | 0.568 | 1.15  |
| SERPINH1-mRNA | -1.5  | 0.378 | -2.25 |
| CD28-mRNA     | 2.46  | 0.623 | 1.24  |
| FBP1-mRNA     | 1.88  | 0.476 | 0.947 |
| TGFB1-mRNA    | 2.24  | 0.567 | 1.13  |
| FCGR3A/B-mRNA | 2.58  | 0.66  | 1.28  |
| LAIR1-mRNA    | 2.44  | 0.629 | 1.21  |
| GNLY-mRNA     | 3.32  | 0.86  | 1.64  |
| ITGB2-mRNA    | 1.9   | 0.493 | 0.937 |
| CD80-mRNA     | 3.36  | 0.87  | 1.65  |
| MS4A6A-mRNA   | 3.64  | 0.948 | 1.79  |
| ITGA4-mRNA    | 2.13  | 0.557 | 1.04  |
| TIGIT-mRNA    | 3.57  | 0.933 | 1.74  |
| CD3E-mRNA     | 3.39  | 0.899 | 1.62  |
| PSMB9-mRNA    | 2.42  | 0.644 | 1.16  |

|               |        |       |       |
|---------------|--------|-------|-------|
| HLA-E-mRNA    | 1.68   | 0.449 | 0.8   |
| HLA-DPB1-mRNA | 2.48   | 0.664 | 1.18  |
| IL16-mRNA     | 2.54   | 0.683 | 1.21  |
| CD14-mRNA     | 2.08   | 0.559 | 0.982 |
| CSF1R-mRNA    | 2.28   | 0.615 | 1.08  |
| OAS2-mRNA     | 2.66   | 0.72  | 1.25  |
| TREM2-mRNA    | 1.72   | 0.466 | 0.803 |
| CDKN1A-mRNA   | 2.39   | 0.65  | 1.12  |
| CD7-mRNA      | 3.07   | 0.837 | 1.43  |
| OASL-mRNA     | 2.85   | 0.775 | 1.33  |
| MSH6-mRNA     | -0.988 | 0.269 | -1.52 |
| TNF-mRNA      | 2.27   | 0.62  | 1.05  |
| GBP2-mRNA     | 2.2    | 0.602 | 1.02  |
| TRAT1-mRNA    | 3.53   | 0.973 | 1.62  |
| CD45RB-mRNA   | 2.27   | 0.628 | 1.04  |
| CD27-mRNA     | 3.23   | 0.904 | 1.46  |
| MS4A4A-mRNA   | 2.54   | 0.709 | 1.15  |
| LILRA1-mRNA   | 2.47   | 0.69  | 1.11  |
| HDAC5-mRNA    | -1.16  | 0.327 | -1.81 |
| TAP1-mRNA     | 2.3    | 0.65  | 1.02  |
| CCL4-mRNA     | 2.64   | 0.751 | 1.17  |
| CD5-mRNA      | 2.67   | 0.76  | 1.18  |
| HLA-B-mRNA    | 1.83   | 0.524 | 0.801 |
| HLA-C-mRNA    | 1.5    | 0.433 | 0.651 |
| VCAM1-mRNA    | 2.93   | 0.85  | 1.27  |
| CD44-mRNA     | 1.51   | 0.437 | 0.651 |
| CD300A-mRNA   | 1.93   | 0.564 | 0.827 |
| TNFAIP3-mRNA  | 2.23   | 0.651 | 0.953 |
| JAK3-mRNA     | 2.25   | 0.658 | 0.959 |
| GPSM3-mRNA    | 2.12   | 0.622 | 0.905 |
| TLR2-mRNA     | 1.96   | 0.574 | 0.832 |
| STAT4-mRNA    | 3.29   | 0.966 | 1.4   |
| BBS1-mRNA     | -1.13  | 0.333 | -1.78 |
| CCR4-mRNA     | 3.31   | 0.993 | 1.36  |
| TRAF1-mRNA    | 1.81   | 0.544 | 0.744 |
| PIK3CD-mRNA   | 1.52   | 0.46  | 0.622 |
| CCL8-mRNA     | 3.68   | 1.12  | 1.49  |
| PIK3R5-mRNA   | 2.12   | 0.645 | 0.86  |
| CD69-mRNA     | 2.74   | 0.832 | 1.11  |
| HAVCR2-mRNA   | 2.14   | 0.658 | 0.854 |
| EOMES-mRNA    | 2.87   | 0.884 | 1.14  |
| CCL3/L1-mRNA  | 2.51   | 0.776 | 0.993 |
| ITGAM-mRNA    | 2.01   | 0.62  | 0.791 |
| TAP2-mRNA     | 1.79   | 0.555 | 0.703 |
| CD48-mRNA     | 2.51   | 0.784 | 0.971 |
| FCGR2A-mRNA   | 1.69   | 0.53  | 0.651 |
| ZAP70-mRNA    | 3.15   | 0.99  | 1.21  |

|               |        |       |       |
|---------------|--------|-------|-------|
| HLA-A-mRNA    | 2.66   | 0.845 | 1.01  |
| CD86-mRNA     | 2.4    | 0.763 | 0.909 |
| SH2D1A-mRNA   | 3.14   | 0.997 | 1.19  |
| LTB-mRNA      | 2.67   | 0.851 | 0.999 |
| TBXAS1-mRNA   | 1.74   | 0.558 | 0.645 |
| NCR1-mRNA     | 2.42   | 0.783 | 0.885 |
| APOE-mRNA     | 1.76   | 0.572 | 0.64  |
| SOCS1-mRNA    | 2.32   | 0.756 | 0.839 |
| IL11RA-mRNA   | -1.84  | 0.599 | -3.01 |
| HLA-DRB1-mRNA | 1.9    | 0.622 | 0.678 |
| CMKLR1-mRNA   | 3.15   | 1.03  | 1.12  |
| PC-mRNA       | -1.37  | 0.449 | -2.25 |
| HLA-F-mRNA    | 2.22   | 0.735 | 0.78  |
| HLA-DPA1-mRNA | 2.21   | 0.733 | 0.769 |
| LY9-mRNA      | 3.43   | 1.14  | 1.19  |
| OAS1-mRNA     | 2.05   | 0.684 | 0.712 |
| PTGER4-mRNA   | 2.05   | 0.683 | 0.709 |
| NLRC5-mRNA    | 1.98   | 0.662 | 0.687 |
| CLEC7A-mRNA   | 2.24   | 0.748 | 0.77  |
| CD163-mRNA    | 1.9    | 0.635 | 0.653 |
| IFI35-mRNA    | 1.88   | 0.632 | 0.637 |
| PVRIG-mRNA    | 2.25   | 0.758 | 0.765 |
| IRF1-mRNA     | 1.6    | 0.549 | 0.526 |
| FCGR2B-mRNA   | 1.46   | 0.508 | 0.46  |
| IL7R-mRNA     | 2.87   | 1.02  | 0.884 |
| CD74-mRNA     | 1.74   | 0.623 | 0.519 |
| ALDOC-mRNA    | -1.29  | 0.464 | -2.2  |
| ISG15-mRNA    | 2.12   | 0.766 | 0.614 |
| RELB-mRNA     | 0.857  | 0.31  | 0.248 |
| MX1-mRNA      | 2.2    | 0.804 | 0.622 |
| MAP3K12-mRNA  | -1.36  | 0.501 | -2.34 |
| HLA-DMB-mRNA  | 1.73   | 0.648 | 0.463 |
| P2RY13-mRNA   | 3.17   | 1.19  | 0.835 |
| IRF7-mRNA     | 1.82   | 0.688 | 0.477 |
| IRF2-mRNA     | 0.8    | 0.302 | 0.207 |
| IRF3-mRNA     | 0.701  | 0.266 | 0.18  |
| OLR1-mRNA     | 1.87   | 0.71  | 0.479 |
| SREBF1-mRNA   | -1.02  | 0.387 | -1.78 |
| BCL2-mRNA     | 1.64   | 0.624 | 0.416 |
| OAS3-mRNA     | 1.77   | 0.675 | 0.443 |
| TLR1-mRNA     | 2.46   | 0.944 | 0.609 |
| VTCN1-mRNA    | -1.92  | 0.737 | -3.36 |
| BRD3-mRNA     | -0.684 | 0.263 | -1.2  |
| FYN-mRNA      | 0.988  | 0.38  | 0.243 |
| BBC3-mRNA     | 1.55   | 0.596 | 0.38  |
| CD4-mRNA      | 2.21   | 0.857 | 0.53  |
| ITGA1-mRNA    | 1.15   | 0.445 | 0.273 |

|               |        |       |        |
|---------------|--------|-------|--------|
| A2M-mRNA      | 1.28   | 0.497 | 0.302  |
| TNFSF8-mRNA   | 2.1    | 0.822 | 0.493  |
| SIGLEC1-mRNA  | 2.82   | 1.1   | 0.659  |
| CCR2-mRNA     | 2.23   | 0.872 | 0.519  |
| MFNG-mRNA     | 1.33   | 0.523 | 0.302  |
| SIRPB2-mRNA   | 1.77   | 0.702 | 0.391  |
| RORC-mRNA     | -1.61  | 0.645 | -2.87  |
| LGALS9-mRNA   | 1.46   | 0.592 | 0.299  |
| AXL-mRNA      | 1.85   | 0.751 | 0.379  |
| TLR7-mRNA     | 2.24   | 0.913 | 0.448  |
| HMGB1-mRNA    | -1.02  | 0.417 | -1.84  |
| MTOR-mRNA     | -0.389 | 0.159 | -0.701 |
| RPTOR-mRNA    | -1.13  | 0.466 | -2.04  |
| TNFSF13B-mRNA | 1.92   | 0.796 | 0.362  |
| MRC1-mRNA     | 2.22   | 0.928 | 0.401  |
| CX3CR1-mRNA   | 2.24   | 0.939 | 0.402  |
| TMEM140-mRNA  | 2.17   | 0.914 | 0.383  |
| MYD88-mRNA    | 0.958  | 0.403 | 0.168  |
| RELA-mRNA     | -0.559 | 0.235 | -1.02  |
| EIF2B4-mRNA   | -0.837 | 0.352 | -1.53  |
| FADD-mRNA     | -0.463 | 0.196 | -0.847 |
| SYK-mRNA      | 0.804  | 0.34  | 0.138  |
| IL1B-mRNA     | 2.06   | 0.875 | 0.349  |
| IRF5-mRNA     | 0.998  | 0.428 | 0.16   |
| CASP9-mRNA    | -0.495 | 0.212 | -0.911 |
| CDKN2A-mRNA   | 1.37   | 0.59  | 0.216  |
| APOL6-mRNA    | 1.26   | 0.541 | 0.196  |
| XCL1/2-mRNA   | 1.76   | 0.761 | 0.269  |
| CDK6-mRNA     | -1.27  | 0.549 | -2.35  |
| SMAD5-mRNA    | -0.805 | 0.351 | -1.49  |
| MMP9-mRNA     | 1.48   | 0.649 | 0.209  |
| PRKCA-mRNA    | -1.62  | 0.709 | -3.01  |
| RSAD2-mRNA    | 1.94   | 0.854 | 0.266  |
| MMRN2-mRNA    | -1.53  | 0.679 | -2.86  |
| IFIT2-mRNA    | 1.88   | 0.841 | 0.229  |
| NFKBIA-mRNA   | 1.17   | 0.529 | 0.136  |
| CSF1-mRNA     | 1.26   | 0.57  | 0.147  |
| NFATC2-mRNA   | 1.09   | 0.491 | 0.124  |
| DNMT1-mRNA    | 0.931  | 0.423 | 0.102  |
| MAP3K7-mRNA   | -0.455 | 0.207 | -0.861 |
| SNCA-mRNA     | -1.66  | 0.757 | -3.14  |
| IFIH1-mRNA    | 1.5    | 0.686 | 0.152  |
| GLS-mRNA      | 1.15   | 0.529 | 0.11   |
| WNT5A-mRNA    | 1.94   | 0.927 | 0.122  |
| MS4A1-mRNA    | 2.46   | 1.18  | 0.145  |
| PSMB8-mRNA    | 1.13   | 0.542 | 0.0632 |
| NOD2-mRNA     | 1.32   | 0.634 | 0.0731 |

|                |        |       |          |
|----------------|--------|-------|----------|
| CSF3R-mRNA     | 1.43   | 0.695 | 0.0633   |
| FPR1-mRNA      | 1.75   | 0.855 | 0.077    |
| THY1-mRNA      | -2.03  | 0.993 | -3.98    |
| MSH2-mRNA      | -0.8   | 0.391 | -1.57    |
| ARNT2-mRNA     | -1.99  | 0.975 | -3.9     |
| ICAM3-mRNA     | 0.912  | 0.451 | 0.0286   |
| SERPINA1-mRNA  | 1.64   | 0.81  | 0.0505   |
| SBNO2-mRNA     | 0.807  | 0.4   | 0.0228   |
| IFI27-mRNA     | 1.42   | 0.703 | 0.0396   |
| MRE11-mRNA     | -0.631 | 0.314 | -1.25    |
| PIK3R2-mRNA    | -0.822 | 0.41  | -1.63    |
| HLA-DRA-mRNA   | 1.36   | 0.682 | 0.0232   |
| CCND3-mRNA     | 0.897  | 0.452 | 0.0117   |
| GOT2-mRNA      | -0.517 | 0.262 | -1.03    |
| PARP9-mRNA     | 1.02   | 0.52  | 0.0028   |
| SAMD9-mRNA     | 1.28   | 0.654 | 0.00118  |
| RPS6KB1-mRNA   | -0.589 | 0.301 | -1.18    |
| VSIR-mRNA      | 1.1    | 0.566 | -0.00872 |
| MFGE8-mRNA     | -1.56  | 0.804 | -3.14    |
| PALMD-mRNA     | -1.96  | 1.01  | -3.95    |
| HLA-DMA-mRNA   | 1.39   | 0.714 | -0.0142  |
| FCGRT-mRNA     | 0.805  | 0.416 | -0.0113  |
| IL6-mRNA       | 2.07   | 1.09  | -0.0678  |
| DUSP2-mRNA     | 1.25   | 0.663 | -0.0451  |
| VEGFB-mRNA     | -0.574 | 0.304 | -1.17    |
| IFIT3-mRNA     | 1.51   | 0.803 | -0.0597  |
| MET-mRNA       | -1.21  | 0.648 | -2.48    |
| SGK1-mRNA      | 1.13   | 0.605 | -0.0587  |
| CD79A-mRNA     | 3.41   | 1.85  | -0.221   |
| ICOSLG-mRNA    | 0.733  | 0.401 | -0.0522  |
| PROM1-mRNA     | 1.9    | 1.05  | -0.156   |
| TNFRSF11A-mRNA | 1.59   | 0.887 | -0.144   |
| PARP12-mRNA    | 0.775  | 0.432 | -0.0712  |
| IL1RN-mRNA     | 1.63   | 0.908 | -0.152   |
| RB1-mRNA       | 0.705  | 0.394 | -0.0667  |
| PSMB5-mRNA     | -0.431 | 0.241 | -0.904   |
| CD19-mRNA      | 1.93   | 1.08  | -0.194   |
| IDO1-mRNA      | 3.49   | 1.98  | -0.387   |
| BAD-mRNA       | -0.514 | 0.292 | -1.09    |
| PRKAA2-mRNA    | -1.33  | 0.76  | -2.82    |
| TNFSF12-mRNA   | 0.791  | 0.454 | -0.0976  |
| P4HA1-mRNA     | -0.814 | 0.467 | -1.73    |
| NOTCH1-mRNA    | -0.996 | 0.578 | -2.13    |
| TAPBP-mRNA     | 0.816  | 0.475 | -0.115   |
| IL15-mRNA      | 0.928  | 0.541 | -0.133   |
| TCF3-mRNA      | 0.5    | 0.293 | -0.0733  |
| NECTIN1-mRNA   | -1.37  | 0.799 | -2.93    |

|               |        |       |        |
|---------------|--------|-------|--------|
| NFIL3-mRNA    | -0.904 | 0.529 | -1.94  |
| CCNA1-mRNA    | 1.6    | 0.946 | -0.251 |
| CD276-mRNA    | -0.595 | 0.351 | -1.28  |
| CLEC5A-mRNA   | 1.2    | 0.724 | -0.22  |
| MICA-mRNA     | -1.09  | 0.66  | -2.38  |
| PRKACB-mRNA   | 0.993  | 0.601 | -0.186 |
| CCL18-mRNA    | 0.986  | 0.603 | -0.197 |
| PSMB10-mRNA   | 1.12   | 0.696 | -0.239 |
| SLC16A1-mRNA  | -1.32  | 0.818 | -2.92  |
| IFI6-mRNA     | 1.19   | 0.746 | -0.276 |
| IFNGR2-mRNA   | 0.403  | 0.258 | -0.103 |
| ERBB2-mRNA    | -0.688 | 0.442 | -1.55  |
| OLFML2B-mRNA  | 1.35   | 0.87  | -0.355 |
| CDKN2B-mRNA   | 0.892  | 0.58  | -0.245 |
| GOT1-mRNA     | -0.54  | 0.353 | -1.23  |
| DTX4-mRNA     | -1.34  | 0.877 | -3.06  |
| IFIT1-mRNA    | 1.23   | 0.815 | -0.366 |
| KRAS-mRNA     | -0.386 | 0.257 | -0.889 |
| DUSP5-mRNA    | 1.17   | 0.784 | -0.366 |
| RRM2-mRNA     | -0.973 | 0.653 | -2.25  |
| WNT10A-mRNA   | -1.55  | 1.05  | -3.61  |
| VEGFA-mRNA    | -1.21  | 0.819 | -2.82  |
| DTX3L-mRNA    | 0.646  | 0.437 | -0.21  |
| PVR-mRNA      | -0.773 | 0.524 | -1.8   |
| FGFR1-mRNA    | -1.07  | 0.732 | -2.51  |
| PMS2-mRNA     | -0.348 | 0.24  | -0.82  |
| NOTCH2-mRNA   | -0.568 | 0.392 | -1.34  |
| PTCD2-mRNA    | -0.564 | 0.391 | -1.33  |
| MXI1-mRNA     | -0.902 | 0.626 | -2.13  |
| CRABP2-mRNA   | -1.31  | 0.912 | -3.1   |
| EIF2AK2-mRNA  | 0.664  | 0.467 | -0.251 |
| PKM-mRNA      | -0.443 | 0.312 | -1.05  |
| S100A8-mRNA   | 0.965  | 0.68  | -0.368 |
| IRF9-mRNA     | 0.571  | 0.403 | -0.22  |
| MB21D1-mRNA   | 0.669  | 0.479 | -0.269 |
| NFKB2-mRNA    | 0.484  | 0.348 | -0.197 |
| ARID1A-mRNA   | -0.252 | 0.181 | -0.607 |
| NF1-mRNA      | -0.509 | 0.367 | -1.23  |
| FGF18-mRNA    | -1.2   | 0.888 | -2.94  |
| ITGAV-mRNA    | -0.622 | 0.46  | -1.52  |
| RPL7A-mRNA    | -0.386 | 0.289 | -0.953 |
| ITPK1-mRNA    | -0.261 | 0.196 | -0.645 |
| HIF1A-mRNA    | 0.377  | 0.284 | -0.179 |
| C2-mRNA       | 0.837  | 0.635 | -0.406 |
| PDZK1IP1-mRNA | -1.58  | 1.21  | -3.94  |
| SPP1-mRNA     | 1.07   | 0.819 | -0.539 |
| CEP55-mRNA    | 0.812  | 0.624 | -0.411 |

|               |        |       |        |
|---------------|--------|-------|--------|
| HDAC11-mRNA   | -0.759 | 0.587 | -1.91  |
| NBN-mRNA      | -0.348 | 0.271 | -0.879 |
| EPCAM-mRNA    | -0.666 | 0.518 | -1.68  |
| IFITM1-mRNA   | 0.878  | 0.697 | -0.488 |
| TPM1-mRNA     | -0.607 | 0.482 | -1.55  |
| TP53-mRNA     | 0.787  | 0.627 | -0.442 |
| RIPK3-mRNA    | 0.674  | 0.537 | -0.379 |
| IFNAR1-mRNA   | -0.461 | 0.368 | -1.18  |
| KAT2B-mRNA    | 0.571  | 0.461 | -0.332 |
| COL5A1-mRNA   | -1.03  | 0.848 | -2.7   |
| IFI16-mRNA    | 0.879  | 0.729 | -0.549 |
| SLC7A5-mRNA   | 0.974  | 0.814 | -0.622 |
| TRIM21-mRNA   | 0.847  | 0.715 | -0.555 |
| IL18-mRNA     | 0.869  | 0.738 | -0.577 |
| COL4A5-mRNA   | -1.19  | 1.01  | -3.17  |
| UBA7-mRNA     | 0.593  | 0.507 | -0.402 |
| CDC20-mRNA    | 0.772  | 0.663 | -0.528 |
| ITGB8-mRNA    | -1.02  | 0.883 | -2.76  |
| NFKBIE-mRNA   | 0.569  | 0.493 | -0.398 |
| CTNNB1-mRNA   | -0.302 | 0.262 | -0.816 |
| SNAI1-mRNA    | 0.548  | 0.476 | -0.384 |
| TGFBR1-mRNA   | 0.318  | 0.279 | -0.228 |
| SFXN1-mRNA    | -0.393 | 0.345 | -1.07  |
| CDH11-mRNA    | -0.952 | 0.84  | -2.6   |
| ITGA6-mRNA    | -0.518 | 0.458 | -1.42  |
| CD58-mRNA     | 0.787  | 0.696 | -0.577 |
| ATM-mRNA      | 0.362  | 0.321 | -0.267 |
| PIAS4-mRNA    | 0.299  | 0.265 | -0.221 |
| PTEN-mRNA     | -0.668 | 0.599 | -1.84  |
| PIK3CA-mRNA   | -0.377 | 0.351 | -1.07  |
| TNFRSF14-mRNA | 0.462  | 0.432 | -0.384 |
| CD36-mRNA     | 0.991  | 0.929 | -0.829 |
| EGFR-mRNA     | -1.21  | 1.14  | -3.45  |
| MICB-mRNA     | 0.88   | 0.831 | -0.748 |
| HERC6-mRNA    | 0.864  | 0.82  | -0.742 |
| BNIP3-mRNA    | 0.63   | 0.599 | -0.544 |
| PDK1-mRNA     | -0.696 | 0.662 | -1.99  |
| NCAM1-mRNA    | -1.06  | 1.03  | -3.09  |
| HLA-DOA-mRNA  | 0.798  | 0.777 | -0.726 |
| IL1R2-mRNA    | 0.926  | 0.904 | -0.846 |
| STAT2-mRNA    | 0.442  | 0.434 | -0.408 |
| PNOC-mRNA     | -0.679 | 0.667 | -1.99  |
| PLOD2-mRNA    | -0.89  | 0.88  | -2.61  |
| CHUK-mRNA     | 0.376  | 0.373 | -0.355 |
| FLNB-mRNA     | -0.548 | 0.557 | -1.64  |
| CX3CL1-mRNA   | -0.845 | 0.86  | -2.53  |
| TGFBR2-mRNA   | 0.389  | 0.398 | -0.392 |

|                |        |       |        |
|----------------|--------|-------|--------|
| ATF3-mRNA      | 0.863  | 0.899 | -0.898 |
| TGFB2-mRNA     | 1.03   | 1.07  | -1.08  |
| CXCR4-mRNA     | 0.542  | 0.567 | -0.569 |
| SLC11A1-mRNA   | 0.571  | 0.609 | -0.624 |
| MAP3K8-mRNA    | 0.373  | 0.399 | -0.409 |
| IKBKG-mRNA     | 0.486  | 0.521 | -0.536 |
| DUSP1-mRNA     | 0.651  | 0.699 | -0.719 |
| TNFRSF10B-mRNA | 0.689  | 0.749 | -0.779 |
| RICTOR-mRNA    | -0.323 | 0.351 | -1.01  |
| RASAL1-mRNA    | -0.368 | 0.403 | -1.16  |
| EPM2AIP1-mRNA  | -0.298 | 0.331 | -0.947 |
| TTC30A-mRNA    | -0.537 | 0.608 | -1.73  |
| BRCA1-mRNA     | -0.759 | 0.863 | -2.45  |
| ROCK1-mRNA     | 0.27   | 0.31  | -0.338 |
| BID-mRNA       | -0.476 | 0.548 | -1.55  |
| IFITM2-mRNA    | -0.478 | 0.554 | -1.56  |
| ITGAE-mRNA     | 0.189  | 0.22  | -0.241 |
| TNFSF4-mRNA    | 0.448  | 0.535 | -0.602 |
| MELK-mRNA      | 0.468  | 0.567 | -0.644 |
| TLR8-mRNA      | -0.645 | 0.785 | -2.18  |
| BNIP3L-mRNA    | 0.402  | 0.493 | -0.564 |
| NRAS-mRNA      | 0.22   | 0.271 | -0.311 |
| TPSAB1/B2-mRNA | 0.654  | 0.814 | -0.941 |
| TICAM1-mRNA    | -0.565 | 0.704 | -1.94  |
| AXIN1-mRNA     | 0.476  | 0.595 | -0.69  |
| VCAN-mRNA      | 0.565  | 0.708 | -0.823 |
| MKI67-mRNA     | 0.442  | 0.558 | -0.651 |
| FUT4-mRNA      | 0.552  | 0.702 | -0.823 |
| IGF2R-mRNA     | -0.303 | 0.386 | -1.06  |
| DDB2-mRNA      | 0.47   | 0.602 | -0.71  |
| FANCA-mRNA     | -0.586 | 0.752 | -2.06  |
| GLUD1-mRNA     | -0.207 | 0.267 | -0.731 |
| HDAC4-mRNA     | -0.333 | 0.43  | -1.18  |
| E2F3-mRNA      | -0.53  | 0.688 | -1.88  |
| NEIL1-mRNA     | -0.647 | 0.846 | -2.31  |
| RIPK2-mRNA     | 0.374  | 0.496 | -0.597 |
| DPP4-mRNA      | -0.539 | 0.725 | -1.96  |
| RBL2-mRNA      | -0.249 | 0.342 | -0.919 |
| F2RL1-mRNA     | -0.668 | 0.932 | -2.49  |
| TNFRSF1A-mRNA  | -0.234 | 0.329 | -0.878 |
| TNFSF10-mRNA   | 0.609  | 0.885 | -1.12  |
| NECTIN2-mRNA   | -0.283 | 0.414 | -1.09  |
| IL6R-mRNA      | 0.249  | 0.366 | -0.469 |
| BRIP1-mRNA     | -0.429 | 0.637 | -1.68  |
| SRP54-mRNA     | -0.145 | 0.217 | -0.57  |
| ESR1-mRNA      | -0.372 | 0.556 | -1.46  |
| PCK2-mRNA      | 0.252  | 0.39  | -0.512 |

|               |        |       |        |
|---------------|--------|-------|--------|
| PPARGC1B-mRNA | -0.433 | 0.673 | -1.75  |
| CASP8-mRNA    | -0.346 | 0.548 | -1.42  |
| CDH2-mRNA     | -0.756 | 1.2   | -3.1   |
| RAD50-mRNA    | -0.158 | 0.254 | -0.655 |
| TMEM173-mRNA  | 0.402  | 0.649 | -0.869 |
| ELOB-mRNA     | -0.45  | 0.728 | -1.88  |
| WNT2B-mRNA    | 0.384  | 0.625 | -0.84  |
| HELLS-mRNA    | -0.301 | 0.495 | -1.27  |
| HDAC3-mRNA    | -0.145 | 0.246 | -0.628 |
| ROR2-mRNA     | -0.625 | 1.06  | -2.7   |
| BRCA2-mRNA    | 0.45   | 0.768 | -1.06  |
| MGMT-mRNA     | 0.355  | 0.609 | -0.839 |
| ERO1A-mRNA    | -0.329 | 0.569 | -1.44  |
| LTBP1-mRNA    | -0.586 | 1.03  | -2.6   |
| FZD8-mRNA     | -0.486 | 0.868 | -2.19  |
| SMAP1-mRNA    | -0.134 | 0.24  | -0.603 |
| TWF1-mRNA     | -0.196 | 0.361 | -0.904 |
| GPC4-mRNA     | 0.458  | 0.848 | -1.2   |
| JAK1-mRNA     | 0.184  | 0.347 | -0.497 |
| EIF4EBP1-mRNA | -0.217 | 0.414 | -1.03  |
| IKBKB-mRNA    | 0.304  | 0.583 | -0.838 |
| ANGPTL4-mRNA  | -1.08  | 2.08  | -5.16  |
| AKT1-mRNA     | 0.143  | 0.28  | -0.406 |
| ICAM1-mRNA    | -0.411 | 0.822 | -2.02  |
| MAML2-mRNA    | -0.256 | 0.519 | -1.27  |
| MMP7-mRNA     | -0.816 | 1.67  | -4.09  |
| APH1B-mRNA    | -0.332 | 0.684 | -1.67  |
| ZC3H12A-mRNA  | 0.285  | 0.586 | -0.864 |
| CXCL8-mRNA    | 0.367  | 0.763 | -1.13  |
| EXO1-mRNA     | -0.426 | 0.888 | -2.17  |
| TPI1-mRNA     | -0.191 | 0.403 | -0.982 |
| SLC1A5-mRNA   | -0.182 | 0.384 | -0.935 |
| WDR76-mRNA    | 0.204  | 0.431 | -0.641 |
| P4HA2-mRNA    | -0.208 | 0.452 | -1.09  |
| NFKB1-mRNA    | 0.238  | 0.521 | -0.783 |
| HRAS-mRNA     | -0.235 | 0.516 | -1.25  |
| RAD51-mRNA    | -0.31  | 0.687 | -1.66  |
| PARP4-mRNA    | -0.143 | 0.317 | -0.765 |
| FAS-mRNA      | -0.389 | 0.867 | -2.09  |
| HES1-mRNA     | -0.29  | 0.668 | -1.6   |
| CASP3-mRNA    | 0.153  | 0.356 | -0.545 |
| ALDOA-mRNA    | -0.17  | 0.399 | -0.953 |
| LAMB3-mRNA    | -0.334 | 0.787 | -1.88  |
| CDKN1C-mRNA   | -0.174 | 0.414 | -0.986 |
| SLC2A1-mRNA   | -0.302 | 0.72  | -1.71  |
| CDH1-mRNA     | -0.269 | 0.646 | -1.54  |
| GPR160-mRNA   | -0.289 | 0.719 | -1.7   |

|                |         |       |        |
|----------------|---------|-------|--------|
| COL6A3-mRNA    | -0.33   | 0.833 | -1.96  |
| KIF2C-mRNA     | 0.324   | 0.82  | -1.28  |
| CEBPB-mRNA     | -0.151  | 0.384 | -0.902 |
| BIRC5-mRNA     | -0.214  | 0.552 | -1.3   |
| ZEB1-mRNA      | -0.333  | 0.879 | -2.06  |
| ANLN-mRNA      | -0.267  | 0.736 | -1.71  |
| H2AFX-mRNA     | -0.13   | 0.358 | -0.831 |
| CXCL3-mRNA     | -0.327  | 0.903 | -2.1   |
| MYC-mRNA       | -0.308  | 0.857 | -1.99  |
| TREM1-mRNA     | -0.272  | 0.758 | -1.76  |
| AREG-mRNA      | -0.644  | 1.8   | -4.18  |
| RPL23-mRNA     | 0.113   | 0.318 | -0.51  |
| PFKFB3-mRNA    | 0.217   | 0.62  | -0.998 |
| LDHB-mRNA      | -0.124  | 0.359 | -0.828 |
| TNFRSF25-mRNA  | 0.235   | 0.69  | -1.12  |
| HLA-DOB-mRNA   | -0.404  | 1.2   | -2.76  |
| ADM-mRNA       | -0.262  | 0.782 | -1.79  |
| CDK2-mRNA      | -0.113  | 0.337 | -0.774 |
| ID4-mRNA       | -0.325  | 0.982 | -2.25  |
| WNT11-mRNA     | 0.359   | 1.16  | -1.91  |
| HLA-DQA1-mRNA  | 1.01    | 3.28  | -5.42  |
| CCNB1-mRNA     | 0.161   | 0.534 | -0.885 |
| CXCL2-mRNA     | 0.255   | 0.848 | -1.41  |
| CENPF-mRNA     | 0.24    | 0.802 | -1.33  |
| MLH1-mRNA      | 0.0659  | 0.223 | -0.371 |
| STAT3-mRNA     | -0.0933 | 0.337 | -0.754 |
| IFNGR1-mRNA    | 0.139   | 0.514 | -0.868 |
| PIK3R1-mRNA    | 0.12    | 0.474 | -0.808 |
| TLR5-mRNA      | -0.119  | 0.471 | -1.04  |
| HLA-DQB1-mRNA  | 0.635   | 2.6   | -4.46  |
| BCL2L1-mRNA    | -0.0784 | 0.324 | -0.714 |
| BRD4-mRNA      | -0.09   | 0.373 | -0.822 |
| FSTL3-mRNA     | -0.27   | 1.12  | -2.47  |
| NT5E-mRNA      | -0.184  | 0.773 | -1.7   |
| VHL-mRNA       | -0.064  | 0.283 | -0.618 |
| ARG2-mRNA      | -0.138  | 0.61  | -1.33  |
| S100A9-mRNA    | 0.198   | 0.876 | -1.52  |
| CD40-mRNA      | 0.14    | 0.62  | -1.08  |
| GAS1-mRNA      | -0.211  | 0.945 | -2.06  |
| LDHA-mRNA      | -0.1    | 0.493 | -1.07  |
| EZH2-mRNA      | -0.06   | 0.311 | -0.67  |
| TNFRSF11B-mRNA | -0.215  | 1.11  | -2.4   |
| MAP3K5-mRNA    | 0.0937  | 0.502 | -0.891 |
| CCL20-mRNA     | -0.229  | 1.26  | -2.69  |
| TAPBPL-mRNA    | -0.0953 | 0.568 | -1.21  |
| FLT1-mRNA      | -0.133  | 0.796 | -1.69  |
| THBS1-mRNA     | 0.142   | 0.869 | -1.56  |

|              |           |       |        |
|--------------|-----------|-------|--------|
| CXCL16-mRNA  | 0.0988    | 0.609 | -1.09  |
| API5-mRNA    | -0.0355   | 0.235 | -0.496 |
| RNLS-mRNA    | -0.118    | 0.787 | -1.66  |
| CBLC-mRNA    | 0.121     | 0.863 | -1.57  |
| TNKS-mRNA    | -0.0668   | 0.501 | -1.05  |
| MARCO-mRNA   | 0.134     | 1.01  | -1.84  |
| PGPEP1-mRNA  | -0.0584   | 0.542 | -1.12  |
| APC-mRNA     | 0.0303    | 0.307 | -0.571 |
| CXCL1-mRNA   | -0.114    | 1.17  | -2.42  |
| CCND1-mRNA   | 0.0757    | 0.787 | -1.47  |
| LAMC2-mRNA   | 0.0832    | 0.866 | -1.62  |
| HK1-mRNA     | -0.0271   | 0.289 | -0.593 |
| CCNE1-mRNA   | 0.0886    | 0.945 | -1.76  |
| HK2-mRNA     | -0.0554   | 0.592 | -1.22  |
| POLD1-mRNA   | 0.0298    | 0.336 | -0.629 |
| SPRY4-mRNA   | 0.108     | 1.22  | -2.29  |
| TNFSF13-mRNA | 0.0365    | 0.46  | -0.865 |
| TLR3-mRNA    | 0.0658    | 0.843 | -1.59  |
| UBE2T-mRNA   | 0.0375    | 0.578 | -1.09  |
| PRR5-mRNA    | -0.0349   | 0.581 | -1.17  |
| LIF-mRNA     | 0.0822    | 1.65  | -3.15  |
| CDC25C-mRNA  | 0.0361    | 0.949 | -1.82  |
| TYMS-mRNA    | -0.0203   | 0.615 | -1.23  |
| JAG1-mRNA    | -0.0166   | 0.536 | -1.07  |
| BLM-mRNA     | -0.0126   | 0.428 | -0.851 |
| DEPTOR-mRNA  | 0.0166    | 0.574 | -1.11  |
| ENO1-mRNA    | -0.0093   | 0.337 | -0.669 |
| SIRPA-mRNA   | 0.0119    | 0.601 | -1.17  |
| HMGA1-mRNA   | 0.00465   | 0.357 | -0.695 |
| BCAT1-mRNA   | -0.0116   | 0.979 | -1.93  |
| UBE2C-mRNA   | -0.00823  | 0.815 | -1.61  |
| RIPK1-mRNA   | 0.00663   | 0.679 | -1.32  |
| EGR1-mRNA    | -0.00373  | 0.688 | -1.35  |
| CD47-mRNA    | -0.000645 | 0.5   | -0.98  |
| AQP9-mRNA    | -0.000483 | 0.772 | -1.51  |
| PTPN11-mRNA  | 9.30E-05  | 0.36  | -0.705 |

| Upper confidence limit (log2) | Linear fold change | Lower confidence limit (linear) |
|-------------------------------|--------------------|---------------------------------|
| 7                             | 54.6               | 23.3                            |
| 4.73                          | 14.4               | 7.76                            |
| 4.5                           | 11.5               | 5.9                             |
| 4.62                          | 12.3               | 6.14                            |
| 4.61                          | 11.6               | 5.5                             |
| 4.99                          | 14.1               | 6.26                            |
| 5.5                           | 18.1               | 7.23                            |
| 4.79                          | 11.9               | 5.07                            |
| 6.61                          | 30.2               | 9.32                            |
| 2.94                          | 4.52               | 2.67                            |
| 5.69                          | 18.6               | 6.72                            |
| 3.75                          | 6.85               | 3.49                            |
| 2.98                          | 4.57               | 2.66                            |
| 5.4                           | 15.6               | 5.79                            |
| 4.44                          | 9.55               | 4.22                            |
| 4.61                          | 10.4               | 4.45                            |
| 4.21                          | 8.45               | 3.85                            |
| 3.47                          | 5.77               | 3.01                            |
| 6.15                          | 22.1               | 6.89                            |
| 6.13                          | 21.7               | 6.72                            |
| 5.99                          | 20.2               | 6.43                            |
| 4.79                          | 11.1               | 4.4                             |
| 5.25                          | 13.8               | 5.03                            |
| 4.26                          | 8.4                | 3.69                            |
| 3.61                          | 6.03               | 2.98                            |
| 2.14                          | 2.9                | 1.91                            |
| 4.9                           | 11.4               | 4.38                            |
| 3.76                          | 6.45               | 3.07                            |
| 4.74                          | 10.5               | 4.11                            |
| 5.83                          | 17.9               | 5.65                            |
| 4.81                          | 10.8               | 4.17                            |
| 3.6                           | 5.92               | 2.9                             |
| 5.17                          | 12.9               | 4.6                             |
| 3.61                          | 5.95               | 2.9                             |
| 4.11                          | 7.56               | 3.31                            |
| 4.61                          | 9.65               | 3.81                            |
| 3.76                          | 6.34               | 2.97                            |
| 5.33                          | 13.6               | 4.6                             |
| 3.32                          | 5.08               | 2.59                            |
| 6.22                          | 21                 | 5.9                             |
| 5.32                          | 13.5               | 4.54                            |
| 3.03                          | 4.39               | 2.36                            |
| 3.15                          | 4.65               | 2.44                            |
| 3.84                          | 6.49               | 2.95                            |
| 5.04                          | 11.6               | 4.14                            |
| 4.03                          | 7.12               | 3.11                            |

|        |       |       |
|--------|-------|-------|
| 5.92   | 17.9  | 5.28  |
| 6.19   | 20.4  | 5.7   |
| 6.26   | 21    | 5.72  |
| 3.84   | 6.45  | 2.91  |
| 4.34   | 8.2   | 3.32  |
| -0.858 | 0.352 | 0.225 |
| 4.34   | 8.15  | 3.28  |
| 3.04   | 4.33  | 2.28  |
| -0.847 | 0.351 | 0.222 |
| 4.29   | 7.9   | 3.19  |
| 6.21   | 19.8  | 5.29  |
| 3.6    | 5.65  | 2.63  |
| 2.73   | 3.71  | 2.08  |
| 2.97   | 4.17  | 2.21  |
| 3.16   | 4.55  | 2.32  |
| 3.09   | 4.41  | 2.28  |
| 4.59   | 8.98  | 3.36  |
| 3.41   | 5.06  | 2.41  |
| 3.34   | 4.88  | 2.36  |
| 3.52   | 5.31  | 2.45  |
| 3.46   | 5.15  | 2.41  |
| 3.31   | 4.79  | 2.31  |
| 3.28   | 4.7   | 2.28  |
| 3.65   | 5.6   | 2.5   |
| 4.88   | 9.95  | 3.36  |
| 3.65   | 5.57  | 2.47  |
| 1.77   | 2.3   | 1.54  |
| 3.79   | 5.88  | 2.5   |
| 2.95   | 3.97  | 2.03  |
| 5.63   | 13.9  | 3.87  |
| 3.54   | 5.22  | 2.33  |
| 4.32   | 7.48  | 2.8   |
| 3.38   | 4.8   | 2.22  |
| -0.764 | 0.352 | 0.211 |
| 3.68   | 5.51  | 2.37  |
| 2.82   | 3.68  | 1.93  |
| 3.35   | 4.72  | 2.18  |
| 3.87   | 5.97  | 2.43  |
| 3.67   | 5.43  | 2.31  |
| 5.01   | 9.99  | 3.11  |
| 2.87   | 3.74  | 1.91  |
| 5.06   | 10.2  | 3.14  |
| 5.5    | 12.5  | 3.45  |
| 3.22   | 4.39  | 2.06  |
| 5.39   | 11.8  | 3.34  |
| 5.15   | 10.5  | 3.08  |
| 3.68   | 5.35  | 2.23  |

|        |       |       |
|--------|-------|-------|
| 2.56   | 3.2   | 1.74  |
| 3.78   | 5.57  | 2.26  |
| 3.88   | 5.84  | 2.31  |
| 3.17   | 4.22  | 1.98  |
| 3.49   | 4.86  | 2.11  |
| 4.07   | 6.32  | 2.38  |
| 2.63   | 3.29  | 1.75  |
| 3.67   | 5.25  | 2.17  |
| 4.71   | 8.42  | 2.7   |
| 4.37   | 7.19  | 2.51  |
| -0.46  | 0.504 | 0.35  |
| 3.48   | 4.82  | 2.08  |
| 3.38   | 4.58  | 2.02  |
| 5.44   | 11.6  | 3.08  |
| 3.5    | 4.83  | 2.06  |
| 5.01   | 9.4   | 2.75  |
| 3.93   | 5.8   | 2.21  |
| 3.82   | 5.53  | 2.17  |
| -0.523 | 0.446 | 0.286 |
| 3.57   | 4.92  | 2.03  |
| 4.11   | 6.24  | 2.25  |
| 4.16   | 6.35  | 2.26  |
| 2.85   | 3.55  | 1.74  |
| 2.35   | 2.83  | 1.57  |
| 4.6    | 7.64  | 2.41  |
| 2.37   | 2.85  | 1.57  |
| 3.04   | 3.81  | 1.77  |
| 3.51   | 4.69  | 1.94  |
| 3.54   | 4.75  | 1.94  |
| 3.34   | 4.36  | 1.87  |
| 3.08   | 3.88  | 1.78  |
| 5.18   | 9.79  | 2.64  |
| -0.476 | 0.457 | 0.291 |
| 5.25   | 9.89  | 2.57  |
| 2.88   | 3.51  | 1.68  |
| 2.43   | 2.88  | 1.54  |
| 5.86   | 12.8  | 2.81  |
| 3.39   | 4.36  | 1.81  |
| 4.37   | 6.68  | 2.16  |
| 3.44   | 4.42  | 1.81  |
| 4.6    | 7.31  | 2.2   |
| 4.04   | 5.72  | 1.99  |
| 3.22   | 4.02  | 1.73  |
| 2.88   | 3.46  | 1.63  |
| 4.05   | 5.69  | 1.96  |
| 2.73   | 3.23  | 1.57  |
| 5.09   | 8.87  | 2.31  |

|        |       |        |
|--------|-------|--------|
| 4.32   | 6.34  | 2.01   |
| 3.9    | 5.29  | 1.88   |
| 5.1    | 8.82  | 2.28   |
| 4.33   | 6.35  | 2      |
| 2.83   | 3.34  | 1.56   |
| 3.95   | 5.35  | 1.85   |
| 2.88   | 3.39  | 1.56   |
| 3.8    | 5     | 1.79   |
| -0.661 | 0.28  | 0.124  |
| 3.12   | 3.72  | 1.6    |
| 5.17   | 8.85  | 2.18   |
| -0.487 | 0.388 | 0.211  |
| 3.66   | 4.66  | 1.72   |
| 3.64   | 4.62  | 1.7    |
| 5.67   | 10.8  | 2.28   |
| 3.39   | 4.15  | 1.64   |
| 3.39   | 4.14  | 1.64   |
| 3.28   | 3.96  | 1.61   |
| 3.7    | 4.71  | 1.71   |
| 3.14   | 3.73  | 1.57   |
| 3.11   | 3.67  | 1.56   |
| 3.74   | 4.76  | 1.7    |
| 2.68   | 3.04  | 1.44   |
| 2.45   | 2.74  | 1.38   |
| 4.86   | 7.33  | 1.85   |
| 2.96   | 3.34  | 1.43   |
| -0.38  | 0.409 | 0.218  |
| 3.62   | 4.34  | 1.53   |
| 1.47   | 1.81  | 1.19   |
| 3.77   | 4.59  | 1.54   |
| -0.377 | 0.39  | 0.197  |
| 3      | 3.32  | 1.38   |
| 5.51   | 9.03  | 1.78   |
| 3.17   | 3.54  | 1.39   |
| 1.39   | 1.74  | 1.15   |
| 1.22   | 1.63  | 1.13   |
| 3.26   | 3.66  | 1.39   |
| -0.259 | 0.494 | 0.292  |
| 2.86   | 3.11  | 1.33   |
| 3.09   | 3.4   | 1.36   |
| 4.31   | 5.5   | 1.52   |
| -0.474 | 0.265 | 0.0973 |
| -0.168 | 0.622 | 0.435  |
| 1.73   | 1.98  | 1.18   |
| 2.72   | 2.93  | 1.3    |
| 3.89   | 4.62  | 1.44   |
| 2.02   | 2.21  | 1.21   |

|         |       |       |
|---------|-------|-------|
| 2.25    | 2.42  | 1.23  |
| 3.71    | 4.3   | 1.41  |
| 4.97    | 7.04  | 1.58  |
| 3.94    | 4.69  | 1.43  |
| 2.35    | 2.51  | 1.23  |
| 3.14    | 3.4   | 1.31  |
| -0.344  | 0.328 | 0.137 |
| 2.62    | 2.75  | 1.23  |
| 3.32    | 3.61  | 1.3   |
| 4.03    | 4.71  | 1.36  |
| -0.202  | 0.493 | 0.28  |
| -0.0772 | 0.764 | 0.615 |
| -0.219  | 0.456 | 0.242 |
| 3.48    | 3.79  | 1.29  |
| 4.04    | 4.66  | 1.32  |
| 4.08    | 4.73  | 1.32  |
| 3.97    | 4.51  | 1.3   |
| 1.75    | 1.94  | 1.12  |
| -0.0977 | 0.679 | 0.493 |
| -0.146  | 0.56  | 0.347 |
| -0.0799 | 0.725 | 0.556 |
| 1.47    | 1.75  | 1.1   |
| 3.78    | 4.18  | 1.27  |
| 1.84    | 2     | 1.12  |
| -0.079  | 0.71  | 0.532 |
| 2.53    | 2.59  | 1.16  |
| 2.32    | 2.39  | 1.15  |
| 3.25    | 3.39  | 1.2   |
| -0.192  | 0.415 | 0.197 |
| -0.117  | 0.573 | 0.355 |
| 2.75    | 2.79  | 1.16  |
| -0.228  | 0.326 | 0.125 |
| 3.61    | 3.83  | 1.2   |
| -0.204  | 0.345 | 0.137 |
| 3.53    | 3.68  | 1.17  |
| 2.21    | 2.26  | 1.1   |
| 2.38    | 2.4   | 1.11  |
| 2.05    | 2.12  | 1.09  |
| 1.76    | 1.91  | 1.07  |
| -0.0486 | 0.73  | 0.55  |
| -0.172  | 0.317 | 0.114 |
| 2.84    | 2.82  | 1.11  |
| 2.18    | 2.21  | 1.08  |
| 3.75    | 3.83  | 1.09  |
| 4.78    | 5.52  | 1.11  |
| 2.19    | 2.18  | 1.04  |
| 2.56    | 2.49  | 1.05  |

|          |       |        |
|----------|-------|--------|
| 2.79     | 2.69  | 1.04   |
| 3.43     | 3.37  | 1.05   |
| -0.0884  | 0.244 | 0.0633 |
| -0.0333  | 0.574 | 0.337  |
| -0.0766  | 0.252 | 0.067  |
| 1.8      | 1.88  | 1.02   |
| 3.22     | 3.11  | 1.04   |
| 1.59     | 1.75  | 1.02   |
| 2.8      | 2.67  | 1.03   |
| -0.0164  | 0.646 | 0.422  |
| -0.0185  | 0.566 | 0.324  |
| 2.7      | 2.57  | 1.02   |
| 1.78     | 1.86  | 1.01   |
| -0.00272 | 0.699 | 0.489  |
| 2.04     | 2.03  | 1      |
| 2.57     | 2.43  | 1      |
| 0.00145  | 0.665 | 0.442  |
| 2.21     | 2.15  | 0.994  |
| 0.015    | 0.339 | 0.114  |
| 0.02     | 0.256 | 0.0648 |
| 2.78     | 2.61  | 0.99   |
| 1.62     | 1.75  | 0.992  |
| 4.21     | 4.2   | 0.954  |
| 2.55     | 2.39  | 0.969  |
| 0.0224   | 0.672 | 0.444  |
| 3.09     | 2.86  | 0.959  |
| 0.0584   | 0.432 | 0.179  |
| 2.31     | 2.19  | 0.96   |
| 7.03     | 10.6  | 0.858  |
| 1.52     | 1.66  | 0.964  |
| 3.95     | 3.73  | 0.897  |
| 3.33     | 3.02  | 0.905  |
| 1.62     | 1.71  | 0.952  |
| 3.41     | 3.09  | 0.9    |
| 1.48     | 1.63  | 0.955  |
| 0.0422   | 0.742 | 0.534  |
| 4.05     | 3.8   | 0.874  |
| 7.36     | 11.2  | 0.765  |
| 0.0591   | 0.7   | 0.471  |
| 0.161    | 0.398 | 0.142  |
| 1.68     | 1.73  | 0.935  |
| 0.101    | 0.569 | 0.302  |
| 0.137    | 0.502 | 0.229  |
| 1.75     | 1.76  | 0.924  |
| 1.99     | 1.9   | 0.912  |
| 1.07     | 1.41  | 0.95   |
| 0.2      | 0.388 | 0.131  |

|        |       |        |
|--------|-------|--------|
| 0.133  | 0.534 | 0.26   |
| 3.46   | 3.04  | 0.84   |
| 0.0934 | 0.662 | 0.411  |
| 2.62   | 2.3   | 0.859  |
| 0.202  | 0.469 | 0.192  |
| 2.17   | 1.99  | 0.879  |
| 2.17   | 1.98  | 0.873  |
| 2.49   | 2.18  | 0.847  |
| 0.285  | 0.401 | 0.132  |
| 2.65   | 2.28  | 0.826  |
| 0.91   | 1.32  | 0.931  |
| 0.178  | 0.621 | 0.341  |
| 3.06   | 2.55  | 0.782  |
| 2.03   | 1.86  | 0.844  |
| 0.152  | 0.688 | 0.426  |
| 0.382  | 0.396 | 0.12   |
| 2.83   | 2.35  | 0.776  |
| 0.117  | 0.765 | 0.54   |
| 2.71   | 2.25  | 0.776  |
| 0.308  | 0.509 | 0.21   |
| 0.504  | 0.34  | 0.0817 |
| 0.393  | 0.432 | 0.142  |
| 1.5    | 1.56  | 0.865  |
| 0.254  | 0.585 | 0.287  |
| 0.36   | 0.475 | 0.176  |
| 0.123  | 0.785 | 0.567  |
| 0.201  | 0.674 | 0.396  |
| 0.203  | 0.676 | 0.398  |
| 0.325  | 0.535 | 0.229  |
| 0.476  | 0.403 | 0.117  |
| 1.58   | 1.58  | 0.84   |
| 0.169  | 0.736 | 0.482  |
| 2.3    | 1.95  | 0.775  |
| 1.36   | 1.49  | 0.859  |
| 1.61   | 1.59  | 0.83   |
| 1.17   | 1.4   | 0.872  |
| 0.103  | 0.84  | 0.656  |
| 0.209  | 0.703 | 0.427  |
| 0.54   | 0.435 | 0.13   |
| 0.28   | 0.65  | 0.348  |
| 0.18   | 0.765 | 0.517  |
| 0.123  | 0.834 | 0.639  |
| 0.933  | 1.3   | 0.883  |
| 2.08   | 1.79  | 0.755  |
| 0.783  | 0.335 | 0.0651 |
| 2.67   | 2.09  | 0.688  |
| 2.03   | 1.76  | 0.752  |

|       |       |        |
|-------|-------|--------|
| 0.392 | 0.591 | 0.266  |
| 0.182 | 0.785 | 0.544  |
| 0.35  | 0.63  | 0.312  |
| 2.24  | 1.84  | 0.713  |
| 0.339 | 0.657 | 0.341  |
| 2.02  | 1.73  | 0.736  |
| 1.73  | 1.6   | 0.769  |
| 0.26  | 0.727 | 0.441  |
| 1.47  | 1.49  | 0.794  |
| 0.627 | 0.488 | 0.154  |
| 2.31  | 1.84  | 0.683  |
| 2.57  | 1.96  | 0.65   |
| 2.25  | 1.8   | 0.681  |
| 2.31  | 1.83  | 0.67   |
| 0.792 | 0.439 | 0.111  |
| 1.59  | 1.51  | 0.757  |
| 2.07  | 1.71  | 0.694  |
| 0.707 | 0.492 | 0.148  |
| 1.54  | 1.48  | 0.759  |
| 0.211 | 0.811 | 0.568  |
| 1.48  | 1.46  | 0.766  |
| 0.864 | 1.25  | 0.854  |
| 0.283 | 0.762 | 0.477  |
| 0.695 | 0.517 | 0.165  |
| 0.38  | 0.698 | 0.375  |
| 2.15  | 1.73  | 0.67   |
| 0.991 | 1.29  | 0.831  |
| 0.819 | 1.23  | 0.858  |
| 0.506 | 0.629 | 0.279  |
| 0.312 | 0.77  | 0.478  |
| 1.31  | 1.38  | 0.766  |
| 2.81  | 1.99  | 0.563  |
| 1.03  | 0.431 | 0.0912 |
| 2.51  | 1.84  | 0.595  |
| 2.47  | 1.82  | 0.598  |
| 1.8   | 1.55  | 0.686  |
| 0.602 | 0.617 | 0.251  |
| 0.963 | 0.479 | 0.118  |
| 2.32  | 1.74  | 0.605  |
| 2.7   | 1.9   | 0.556  |
| 1.29  | 1.36  | 0.754  |
| 0.627 | 0.625 | 0.253  |
| 0.835 | 0.54  | 0.163  |
| 1.11  | 1.3   | 0.782  |
| 0.545 | 0.684 | 0.321  |
| 0.841 | 0.557 | 0.173  |
| 1.17  | 1.31  | 0.762  |

|       |       |       |
|-------|-------|-------|
| 2.62  | 1.82  | 0.536 |
| 3.14  | 2.04  | 0.474 |
| 1.65  | 1.46  | 0.674 |
| 1.77  | 1.49  | 0.649 |
| 1.15  | 1.29  | 0.753 |
| 1.51  | 1.4   | 0.69  |
| 2.02  | 1.57  | 0.608 |
| 2.16  | 1.61  | 0.583 |
| 0.365 | 0.8   | 0.496 |
| 0.422 | 0.775 | 0.448 |
| 0.351 | 0.813 | 0.519 |
| 0.654 | 0.689 | 0.302 |
| 0.934 | 0.591 | 0.183 |
| 0.878 | 1.21  | 0.791 |
| 0.598 | 0.719 | 0.341 |
| 0.608 | 0.718 | 0.338 |
| 0.62  | 1.14  | 0.846 |
| 1.5   | 1.36  | 0.659 |
| 1.58  | 1.38  | 0.64  |
| 0.893 | 0.64  | 0.22  |
| 1.37  | 1.32  | 0.676 |
| 0.751 | 1.16  | 0.806 |
| 2.25  | 1.57  | 0.521 |
| 0.816 | 0.676 | 0.26  |
| 1.64  | 1.39  | 0.62  |
| 1.95  | 1.48  | 0.565 |
| 1.54  | 1.36  | 0.637 |
| 1.93  | 1.47  | 0.565 |
| 0.455 | 0.811 | 0.48  |
| 1.65  | 1.39  | 0.611 |
| 0.888 | 0.666 | 0.24  |
| 0.316 | 0.866 | 0.603 |
| 0.511 | 0.794 | 0.442 |
| 0.817 | 0.692 | 0.272 |
| 1.01  | 0.638 | 0.202 |
| 1.35  | 1.3   | 0.661 |
| 0.882 | 0.688 | 0.257 |
| 0.422 | 0.842 | 0.529 |
| 1.16  | 0.629 | 0.177 |
| 0.411 | 0.851 | 0.544 |
| 2.34  | 1.53  | 0.459 |
| 0.53  | 0.822 | 0.468 |
| 0.966 | 1.19  | 0.723 |
| 0.82  | 0.743 | 0.313 |
| 0.28  | 0.904 | 0.673 |
| 0.718 | 0.773 | 0.363 |
| 1.02  | 1.19  | 0.701 |

|       |       |        |
|-------|-------|--------|
| 0.885 | 0.741 | 0.297  |
| 0.727 | 0.787 | 0.374  |
| 1.59  | 0.592 | 0.116  |
| 0.339 | 0.896 | 0.635  |
| 1.67  | 1.32  | 0.548  |
| 0.977 | 0.732 | 0.272  |
| 1.61  | 1.3   | 0.559  |
| 0.67  | 0.812 | 0.414  |
| 0.338 | 0.904 | 0.647  |
| 1.45  | 0.648 | 0.153  |
| 1.96  | 1.37  | 0.481  |
| 1.55  | 1.28  | 0.559  |
| 0.786 | 0.796 | 0.367  |
| 1.43  | 0.666 | 0.165  |
| 1.22  | 0.714 | 0.219  |
| 0.336 | 0.912 | 0.658  |
| 0.512 | 0.873 | 0.534  |
| 2.12  | 1.37  | 0.434  |
| 0.865 | 1.14  | 0.709  |
| 0.595 | 0.861 | 0.49   |
| 1.45  | 1.23  | 0.559  |
| 3     | 0.473 | 0.0279 |
| 0.692 | 1.1   | 0.755  |
| 1.2   | 0.752 | 0.246  |
| 0.761 | 0.838 | 0.414  |
| 2.46  | 0.568 | 0.0587 |
| 1.01  | 0.794 | 0.314  |
| 1.43  | 1.22  | 0.549  |
| 1.86  | 1.29  | 0.458  |
| 1.31  | 0.744 | 0.223  |
| 0.599 | 0.876 | 0.506  |
| 0.571 | 0.881 | 0.523  |
| 1.05  | 1.15  | 0.641  |
| 0.677 | 0.866 | 0.469  |
| 1.26  | 1.18  | 0.581  |
| 0.777 | 0.85  | 0.421  |
| 1.04  | 0.807 | 0.317  |
| 0.479 | 0.906 | 0.589  |
| 1.31  | 0.763 | 0.235  |
| 1.02  | 0.818 | 0.33   |
| 0.85  | 1.11  | 0.685  |
| 0.613 | 0.889 | 0.517  |
| 1.21  | 0.794 | 0.272  |
| 0.637 | 0.886 | 0.505  |
| 1.11  | 0.811 | 0.305  |
| 0.997 | 0.83  | 0.345  |
| 1.12  | 0.818 | 0.308  |

|       |       |        |
|-------|-------|--------|
| 1.3   | 0.796 | 0.256  |
| 1.93  | 1.25  | 0.411  |
| 0.601 | 0.901 | 0.535  |
| 0.869 | 0.862 | 0.407  |
| 1.39  | 0.794 | 0.24   |
| 1.18  | 0.831 | 0.306  |
| 0.571 | 0.914 | 0.562  |
| 1.44  | 0.797 | 0.234  |
| 1.37  | 0.808 | 0.252  |
| 1.21  | 0.828 | 0.295  |
| 2.89  | 0.64  | 0.0553 |
| 0.737 | 1.08  | 0.702  |
| 1.43  | 1.16  | 0.501  |
| 0.58  | 0.917 | 0.563  |
| 1.59  | 1.18  | 0.461  |
| 1.95  | 0.756 | 0.147  |
| 1.27  | 0.834 | 0.288  |
| 0.549 | 0.925 | 0.585  |
| 1.6   | 0.798 | 0.21   |
| 2.63  | 1.28  | 0.266  |
| 7.43  | 2.01  | 0.0234 |
| 1.21  | 1.12  | 0.541  |
| 1.92  | 1.19  | 0.377  |
| 1.81  | 1.18  | 0.397  |
| 0.503 | 1.05  | 0.773  |
| 0.568 | 0.937 | 0.593  |
| 1.15  | 1.1   | 0.548  |
| 1.05  | 1.09  | 0.571  |
| 0.804 | 0.921 | 0.486  |
| 5.73  | 1.55  | 0.0454 |
| 0.557 | 0.947 | 0.61   |
| 0.642 | 0.94  | 0.566  |
| 1.93  | 0.829 | 0.181  |
| 1.33  | 0.88  | 0.308  |
| 0.49  | 0.957 | 0.651  |
| 1.06  | 0.909 | 0.397  |
| 1.91  | 1.15  | 0.349  |
| 1.35  | 1.1   | 0.474  |
| 1.64  | 0.864 | 0.239  |
| 0.867 | 0.933 | 0.477  |
| 0.55  | 0.959 | 0.628  |
| 1.97  | 0.862 | 0.19   |
| 1.08  | 1.07  | 0.539  |
| 2.24  | 0.853 | 0.155  |
| 1.02  | 0.936 | 0.433  |
| 1.43  | 0.912 | 0.309  |
| 1.85  | 1.1   | 0.339  |

|       |       |       |
|-------|-------|-------|
| 1.29  | 1.07  | 0.468 |
| 0.425 | 0.976 | 0.709 |
| 1.42  | 0.921 | 0.316 |
| 1.81  | 1.09  | 0.337 |
| 0.914 | 0.955 | 0.484 |
| 2.1   | 1.1   | 0.28  |
| 1     | 0.96  | 0.46  |
| 0.632 | 1.02  | 0.673 |
| 2.19  | 0.924 | 0.187 |
| 1.62  | 1.05  | 0.362 |
| 1.78  | 1.06  | 0.326 |
| 0.539 | 0.981 | 0.663 |
| 1.94  | 1.06  | 0.294 |
| 1.1   | 0.962 | 0.431 |
| 0.688 | 1.02  | 0.647 |
| 2.51  | 1.08  | 0.204 |
| 0.938 | 1.03  | 0.549 |
| 1.72  | 1.05  | 0.333 |
| 1.17  | 1.03  | 0.468 |
| 1.1   | 0.976 | 0.444 |
| 3.32  | 1.06  | 0.112 |
| 1.9   | 1.03  | 0.282 |
| 1.18  | 0.986 | 0.428 |
| 1.03  | 0.989 | 0.477 |
| 0.826 | 0.991 | 0.554 |
| 1.14  | 1.01  | 0.464 |
| 0.651 | 0.994 | 0.629 |
| 1.19  | 1.01  | 0.446 |
| 0.705 | 1     | 0.618 |
| 1.91  | 0.992 | 0.262 |
| 1.59  | 0.994 | 0.329 |
| 1.34  | 1     | 0.399 |
| 1.35  | 0.997 | 0.392 |
| 0.979 | 1     | 0.507 |
| 1.51  | 1     | 0.35  |
| 0.705 | 1     | 0.614 |

| Upper confidence limit (linear) | BY.p.value | -log10(BY.p.value) | method |
|---------------------------------|------------|--------------------|--------|
| 128                             | 0.0264     | 1.578396073        | lm.nb  |
| 26.6                            | 0.0264     | 1.578396073        | lm.nb  |
| 22.6                            | 0.055      | 1.259637311        | lm.nb  |
| 24.6                            | 0.055      | 1.259637311        | lm.nb  |
| 24.4                            | 0.0811     | 1.090979146        | lm.nb  |
| 31.8                            | 0.0811     | 1.090979146        | lm.nb  |
| 45.4                            | 0.0881     | 1.055024092        | lm.nb  |
| 27.7                            | 0.097      | 1.013228266        | lm.nb  |
| 97.7                            | 0.097      | 1.013228266        | lm.nb  |
| 7.66                            | 0.097      | 1.013228266        | lm.nb  |
| 51.7                            | 0.097      | 1.013228266        | lm.nb  |
| 13.4                            | 0.097      | 1.013228266        | lm.nb  |
| 7.88                            | 0.097      | 1.013228266        | lm.nb  |
| 42.2                            | 0.097      | 1.013228266        | lm.nb  |
| 21.6                            | 0.097      | 1.013228266        | lm.nb  |
| 24.5                            | 0.097      | 1.013228266        | lm.nb  |
| 18.5                            | 0.097      | 1.013228266        | lm.nb  |
| 11.1                            | 0.097      | 1.013228266        | lm.nb  |
| 70.9                            | 0.097      | 1.013228266        | lm.nb  |
| 69.9                            | 0.097      | 1.013228266        | lm.nb  |
| 63.5                            | 0.097      | 1.013228266        | lm.nb  |
| 27.7                            | 0.097      | 1.013228266        | lm.nb  |
| 38                              | 0.097      | 1.013228266        | lm.nb  |
| 19.1                            | 0.097      | 1.013228266        | lm.nb  |
| 12.2                            | 0.097      | 1.013228266        | lm.nb  |
| 4.41                            | 0.097      | 1.013228266        | lm.nb  |
| 29.8                            | 0.097      | 1.013228266        | lm.nb  |
| 13.6                            | 0.097      | 1.013228266        | lm.nb  |
| 26.8                            | 0.097      | 1.013228266        | lm.nb  |
| 56.7                            | 0.097      | 1.013228266        | lm.nb  |
| 28.1                            | 0.097      | 1.013228266        | lm.nb  |
| 12.1                            | 0.097      | 1.013228266        | lm.nb  |
| 35.9                            | 0.097      | 1.013228266        | lm.nb  |
| 12.2                            | 0.097      | 1.013228266        | lm.nb  |
| 17.2                            | 0.097      | 1.013228266        | lm.nb  |
| 24.4                            | 0.097      | 1.013228266        | lm.nb  |
| 13.5                            | 0.097      | 1.013228266        | lm.nb  |
| 40.2                            | 0.097      | 1.013228266        | lm.nb  |
| 9.97                            | 0.097      | 1.013228266        | lm.nb  |
| 74.7                            | 0.097      | 1.013228266        | lm.nb  |
| 39.9                            | 0.097      | 1.013228266        | lm.nb  |
| 8.16                            | 0.097      | 1.013228266        | lm.nb  |
| 8.87                            | 0.097      | 1.013228266        | lm.nb  |
| 14.3                            | 0.097      | 1.013228266        | lm.nb  |
| 32.8                            | 0.097      | 1.013228266        | lm.nb  |
| 16.3                            | 0.097      | 1.013228266        | lm.nb  |

|       |       |                   |
|-------|-------|-------------------|
| 60.4  | 0.097 | 1.013228266 lm.nb |
| 73    | 0.097 | 1.013228266 lm.nb |
| 76.8  | 0.1   | 1 lm.nb           |
| 14.3  | 0.1   | 1 lm.nb           |
| 20.3  | 0.101 | 0.995678626 lm.nb |
| 0.552 | 0.101 | 0.995678626 lm.nb |
| 20.3  | 0.104 | 0.982966661 lm.nb |
| 8.22  | 0.104 | 0.982966661 lm.nb |
| 0.556 | 0.104 | 0.982966661 lm.nb |
| 19.6  | 0.104 | 0.982966661 lm.nb |
| 73.9  | 0.104 | 0.982966661 lm.nb |
| 12.2  | 0.104 | 0.982966661 lm.nb |
| 6.63  | 0.104 | 0.982966661 lm.nb |
| 7.85  | 0.104 | 0.982966661 lm.nb |
| 8.91  | 0.104 | 0.982966661 lm.nb |
| 8.54  | 0.104 | 0.982966661 lm.nb |
| 24    | 0.108 | 0.966576245 lm.nb |
| 10.7  | 0.121 | 0.91721463 lm.nb  |
| 10.1  | 0.121 | 0.91721463 lm.nb  |
| 11.5  | 0.125 | 0.903089987 lm.nb |
| 11    | 0.125 | 0.903089987 lm.nb |
| 9.94  | 0.127 | 0.896196279 lm.nb |
| 9.69  | 0.129 | 0.88941029 lm.nb  |
| 12.6  | 0.129 | 0.88941029 lm.nb  |
| 29.5  | 0.133 | 0.876148359 lm.nb |
| 12.6  | 0.133 | 0.876148359 lm.nb |
| 3.42  | 0.143 | 0.844663963 lm.nb |
| 13.8  | 0.147 | 0.832682665 lm.nb |
| 7.75  | 0.147 | 0.832682665 lm.nb |
| 49.7  | 0.147 | 0.832682665 lm.nb |
| 11.7  | 0.149 | 0.826813732 lm.nb |
| 20    | 0.149 | 0.826813732 lm.nb |
| 10.4  | 0.152 | 0.818156412 lm.nb |
| 0.589 | 0.152 | 0.818156412 lm.nb |
| 12.9  | 0.155 | 0.809668302 lm.nb |
| 7.04  | 0.155 | 0.809668302 lm.nb |
| 10.2  | 0.155 | 0.809668302 lm.nb |
| 14.6  | 0.163 | 0.787812396 lm.nb |
| 12.8  | 0.167 | 0.777283529 lm.nb |
| 32.1  | 0.167 | 0.777283529 lm.nb |
| 7.32  | 0.167 | 0.777283529 lm.nb |
| 33.4  | 0.167 | 0.777283529 lm.nb |
| 45.3  | 0.168 | 0.774690718 lm.nb |
| 9.35  | 0.17  | 0.769551079 lm.nb |
| 42    | 0.17  | 0.769551079 lm.nb |
| 35.5  | 0.184 | 0.735182177 lm.nb |
| 12.8  | 0.184 | 0.735182177 lm.nb |

|       |       |                   |
|-------|-------|-------------------|
| 5.9   | 0.187 | 0.728158393 lm.nb |
| 13.7  | 0.187 | 0.728158393 lm.nb |
| 14.8  | 0.187 | 0.728158393 lm.nb |
| 9.02  | 0.187 | 0.728158393 lm.nb |
| 11.2  | 0.187 | 0.728158393 lm.nb |
| 16.8  | 0.189 | 0.723538196 lm.nb |
| 6.18  | 0.189 | 0.723538196 lm.nb |
| 12.7  | 0.189 | 0.723538196 lm.nb |
| 26.2  | 0.189 | 0.723538196 lm.nb |
| 20.6  | 0.189 | 0.723538196 lm.nb |
| 0.727 | 0.189 | 0.723538196 lm.nb |
| 11.2  | 0.189 | 0.723538196 lm.nb |
| 10.4  | 0.192 | 0.716698771 lm.nb |
| 43.3  | 0.196 | 0.707743929 lm.nb |
| 11.3  | 0.197 | 0.705533774 lm.nb |
| 32.1  | 0.204 | 0.690369833 lm.nb |
| 15.2  | 0.204 | 0.690369833 lm.nb |
| 14.1  | 0.204 | 0.690369833 lm.nb |
| 0.696 | 0.209 | 0.679853714 lm.nb |
| 11.9  | 0.215 | 0.66756154 lm.nb  |
| 17.3  | 0.218 | 0.661543506 lm.nb |
| 17.8  | 0.22  | 0.657577319 lm.nb |
| 7.23  | 0.224 | 0.649751982 lm.nb |
| 5.1   | 0.232 | 0.634512015 lm.nb |
| 24.3  | 0.233 | 0.632644079 lm.nb |
| 5.16  | 0.233 | 0.632644079 lm.nb |
| 8.21  | 0.236 | 0.627087997 lm.nb |
| 11.4  | 0.236 | 0.627087997 lm.nb |
| 11.6  | 0.236 | 0.627087997 lm.nb |
| 10.1  | 0.236 | 0.627087997 lm.nb |
| 8.48  | 0.236 | 0.627087997 lm.nb |
| 36.3  | 0.236 | 0.627087997 lm.nb |
| 0.719 | 0.242 | 0.616184634 lm.nb |
| 38.1  | 0.263 | 0.580044252 lm.nb |
| 7.35  | 0.263 | 0.580044252 lm.nb |
| 5.38  | 0.267 | 0.573488739 lm.nb |
| 58.3  | 0.269 | 0.57024772 lm.nb  |
| 10.5  | 0.269 | 0.57024772 lm.nb  |
| 20.7  | 0.269 | 0.57024772 lm.nb  |
| 10.8  | 0.283 | 0.548213564 lm.nb |
| 24.3  | 0.286 | 0.543633967 lm.nb |
| 16.4  | 0.286 | 0.543633967 lm.nb |
| 9.34  | 0.286 | 0.543633967 lm.nb |
| 7.35  | 0.289 | 0.539102157 lm.nb |
| 16.5  | 0.3   | 0.522878745 lm.nb |
| 6.62  | 0.301 | 0.521433504 lm.nb |
| 34    | 0.303 | 0.518557371 lm.nb |

|       |       |                   |
|-------|-------|-------------------|
| 20    | 0.312 | 0.505845406 lm.nb |
| 14.9  | 0.312 | 0.505845406 lm.nb |
| 34.2  | 0.312 | 0.505845406 lm.nb |
| 20.2  | 0.318 | 0.49757288 lm.nb  |
| 7.13  | 0.325 | 0.488116639 lm.nb |
| 15.5  | 0.337 | 0.472370099 lm.nb |
| 7.37  | 0.341 | 0.467245621 lm.nb |
| 14    | 0.343 | 0.46470588 lm.nb  |
| 0.632 | 0.344 | 0.463441557 lm.nb |
| 8.67  | 0.348 | 0.458420756 lm.nb |
| 35.9  | 0.348 | 0.458420756 lm.nb |
| 0.714 | 0.348 | 0.458420756 lm.nb |
| 12.7  | 0.359 | 0.444905551 lm.nb |
| 12.5  | 0.362 | 0.441291429 lm.nb |
| 51    | 0.362 | 0.441291429 lm.nb |
| 10.5  | 0.362 | 0.441291429 lm.nb |
| 10.5  | 0.362 | 0.441291429 lm.nb |
| 9.73  | 0.362 | 0.441291429 lm.nb |
| 13    | 0.362 | 0.441291429 lm.nb |
| 8.83  | 0.362 | 0.441291429 lm.nb |
| 8.65  | 0.37  | 0.431798276 lm.nb |
| 13.3  | 0.37  | 0.431798276 lm.nb |
| 6.4   | 0.398 | 0.400116928 lm.nb |
| 5.48  | 0.432 | 0.364516253 lm.nb |
| 29.1  | 0.455 | 0.341988603 lm.nb |
| 7.8   | 0.48  | 0.318758763 lm.nb |
| 0.768 | 0.489 | 0.310691141 lm.nb |
| 12.3  | 0.498 | 0.302770657 lm.nb |
| 2.76  | 0.498 | 0.302770657 lm.nb |
| 13.7  | 0.516 | 0.287350298 lm.nb |
| 0.77  | 0.532 | 0.274088368 lm.nb |
| 8.01  | 0.562 | 0.250263684 lm.nb |
| 45.7  | 0.573 | 0.241845378 lm.nb |
| 9.01  | 0.576 | 0.239577517 lm.nb |
| 2.63  | 0.58  | 0.236572006 lm.nb |
| 2.33  | 0.584 | 0.233587153 lm.nb |
| 9.59  | 0.584 | 0.233587153 lm.nb |
| 0.836 | 0.585 | 0.232844134 lm.nb |
| 7.27  | 0.585 | 0.232844134 lm.nb |
| 8.5   | 0.591 | 0.228412519 lm.nb |
| 19.8  | 0.593 | 0.226945307 lm.nb |
| 0.72  | 0.593 | 0.226945307 lm.nb |
| 0.89  | 0.593 | 0.226945307 lm.nb |
| 3.32  | 0.593 | 0.226945307 lm.nb |
| 6.58  | 0.593 | 0.226945307 lm.nb |
| 14.8  | 0.609 | 0.215382707 lm.nb |
| 4.05  | 0.61  | 0.214670165 lm.nb |

|       |       |                   |
|-------|-------|-------------------|
| 4.76  | 0.613 | 0.212539525 lm.nb |
| 13.1  | 0.615 | 0.211124884 lm.nb |
| 31.4  | 0.615 | 0.211124884 lm.nb |
| 15.3  | 0.616 | 0.210419288 lm.nb |
| 5.1   | 0.631 | 0.199970641 lm.nb |
| 8.82  | 0.649 | 0.187755303 lm.nb |
| 0.788 | 0.672 | 0.172630727 lm.nb |
| 6.15  | 0.697 | 0.156767222 lm.nb |
| 10    | 0.697 | 0.156767222 lm.nb |
| 16.3  | 0.708 | 0.149966742 lm.nb |
| 0.869 | 0.708 | 0.149966742 lm.nb |
| 0.948 | 0.708 | 0.149966742 lm.nb |
| 0.859 | 0.722 | 0.141462802 lm.nb |
| 11.2  | 0.737 | 0.132532512 lm.nb |
| 16.4  | 0.762 | 0.118045029 lm.nb |
| 17    | 0.762 | 0.118045029 lm.nb |
| 15.6  | 0.765 | 0.116338565 lm.nb |
| 3.36  | 0.765 | 0.116338565 lm.nb |
| 0.935 | 0.765 | 0.116338565 lm.nb |
| 0.904 | 0.765 | 0.116338565 lm.nb |
| 0.946 | 0.768 | 0.11463878 lm.nb  |
| 2.77  | 0.769 | 0.11407366 lm.nb  |
| 13.7  | 0.773 | 0.111820506 lm.nb |
| 3.57  | 0.8   | 0.096910013 lm.nb |
| 0.947 | 0.8   | 0.096910013 lm.nb |
| 5.78  | 0.804 | 0.094743951 lm.nb |
| 4.98  | 0.804 | 0.094743951 lm.nb |
| 9.52  | 0.814 | 0.089375595 lm.nb |
| 0.875 | 0.815 | 0.088842391 lm.nb |
| 0.922 | 0.834 | 0.078833949 lm.nb |
| 6.74  | 0.842 | 0.074687909 lm.nb |
| 0.854 | 0.842 | 0.074687909 lm.nb |
| 12.2  | 0.852 | 0.069560405 lm.nb |
| 0.868 | 0.863 | 0.063989204 lm.nb |
| 11.5  | 0.9   | 0.045757491 lm.nb |
| 4.63  | 0.913 | 0.039529222 lm.nb |
| 5.21  | 0.913 | 0.039529222 lm.nb |
| 4.14  | 0.917 | 0.037630664 lm.nb |
| 3.38  | 0.929 | 0.031984286 lm.nb |
| 0.967 | 0.936 | 0.028724151 lm.nb |
| 0.887 | 0.942 | 0.025949097 lm.nb |
| 7.16  | 0.946 | 0.024108864 lm.nb |
| 4.54  | 0.964 | 0.015922966 lm.nb |
| 13.5  | 1     | 0 lm.nb           |
| 27.6  | 1     | 0 lm.nb           |
| 4.56  | 1     | 0 lm.nb           |
| 5.89  | 1     | 0 lm.nb           |

|       |   |             |
|-------|---|-------------|
| 6.91  | 1 | 0 lm.nb     |
| 10.8  | 1 | 0 lm.nb     |
| 0.941 | 1 | 0 lm.nb     |
| 0.977 | 1 | 0 lm.nb     |
| 0.948 | 1 | 0 lm.nb     |
| 3.47  | 1 | 0 lm.nb     |
| 9.35  | 1 | 0 lm.nb     |
| 3.01  | 1 | 0 lm.nb     |
| 6.94  | 1 | 0 lm.nb     |
| 0.989 | 1 | 0 lm.nb     |
| 0.987 | 1 | 0 lm.nb     |
| 6.48  | 1 | 0 lm.nb     |
| 3.44  | 1 | 0 lm.nb     |
| 0.998 | 1 | 0 lm.nb     |
| 4.12  | 1 | 0 lm.nb     |
| 5.92  | 1 | 0 lm.nb     |
| 1     | 1 | 0 lm.nb     |
| 4.63  | 1 | 0 lm.nb     |
| 1.01  | 1 | 0 lm.nb     |
| 1.01  | 1 | 0 lm.nb     |
| 6.89  | 1 | 0 lm.nb     |
| 3.08  | 1 | 0 lm.nb     |
| 18.5  | 1 | 0 lm.nb     |
| 5.88  | 1 | 0 lm.nb     |
| 1.02  | 1 | 0 lm.nb     |
| 8.5   | 1 | 0 lm.nb     |
| 1.04  | 1 | 0 lm.nb     |
| 4.97  | 1 | 0 lm.nb     |
| 131   | 1 | 0 loglinear |
| 2.87  | 1 | 0 lm.nb     |
| 15.5  | 1 | 0 lm.nb     |
| 10.1  | 1 | 0 lm.nb     |
| 3.08  | 1 | 0 lm.nb     |
| 10.6  | 1 | 0 lm.nb     |
| 2.78  | 1 | 0 lm.nb     |
| 1.03  | 1 | 0 lm.nb     |
| 16.5  | 1 | 0 lm.nb     |
| 165   | 1 | 0 loglinear |
| 1.04  | 1 | 0 lm.nb     |
| 1.12  | 1 | 0 lm.nb     |
| 3.2   | 1 | 0 lm.nb     |
| 1.07  | 1 | 0 lm.nb     |
| 1.1   | 1 | 0 lm.nb     |
| 3.36  | 1 | 0 lm.nb     |
| 3.97  | 1 | 0 lm.nb     |
| 2.1   | 1 | 0 lm.nb     |
| 1.15  | 1 | 0 lm.nb     |

|      |   |         |
|------|---|---------|
| 1.1  | 1 | 0 lm.nb |
| 11   | 1 | 0 lm.nb |
| 1.07 | 1 | 0 lm.nb |
| 6.15 | 1 | 0 lm.nb |
| 1.15 | 1 | 0 lm.nb |
| 4.5  | 1 | 0 lm.nb |
| 4.49 | 1 | 0 lm.nb |
| 5.61 | 1 | 0 lm.nb |
| 1.22 | 1 | 0 lm.nb |
| 6.27 | 1 | 0 lm.nb |
| 1.88 | 1 | 0 lm.nb |
| 1.13 | 1 | 0 lm.nb |
| 8.31 | 1 | 0 lm.nb |
| 4.08 | 1 | 0 lm.nb |
| 1.11 | 1 | 0 lm.nb |
| 1.3  | 1 | 0 lm.nb |
| 7.09 | 1 | 0 lm.nb |
| 1.08 | 1 | 0 lm.nb |
| 6.53 | 1 | 0 lm.nb |
| 1.24 | 1 | 0 lm.nb |
| 1.42 | 1 | 0 lm.nb |
| 1.31 | 1 | 0 lm.nb |
| 2.83 | 1 | 0 lm.nb |
| 1.19 | 1 | 0 lm.nb |
| 1.28 | 1 | 0 lm.nb |
| 1.09 | 1 | 0 lm.nb |
| 1.15 | 1 | 0 lm.nb |
| 1.15 | 1 | 0 lm.nb |
| 1.25 | 1 | 0 lm.nb |
| 1.39 | 1 | 0 lm.nb |
| 2.99 | 1 | 0 lm.nb |
| 1.12 | 1 | 0 lm.nb |
| 4.92 | 1 | 0 lm.nb |
| 2.57 | 1 | 0 lm.nb |
| 3.05 | 1 | 0 lm.nb |
| 2.24 | 1 | 0 lm.nb |
| 1.07 | 1 | 0 lm.nb |
| 1.16 | 1 | 0 lm.nb |
| 1.45 | 1 | 0 lm.nb |
| 1.21 | 1 | 0 lm.nb |
| 1.13 | 1 | 0 lm.nb |
| 1.09 | 1 | 0 lm.nb |
| 1.91 | 1 | 0 lm.nb |
| 4.23 | 1 | 0 lm.nb |
| 1.72 | 1 | 0 lm.nb |
| 6.37 | 1 | 0 lm.nb |
| 4.1  | 1 | 0 lm.nb |

|      |   |         |
|------|---|---------|
| 1.31 | 1 | 0 lm.nb |
| 1.13 | 1 | 0 lm.nb |
| 1.27 | 1 | 0 lm.nb |
| 4.74 | 1 | 0 lm.nb |
| 1.26 | 1 | 0 lm.nb |
| 4.04 | 1 | 0 lm.nb |
| 3.31 | 1 | 0 lm.nb |
| 1.2  | 1 | 0 lm.nb |
| 2.78 | 1 | 0 lm.nb |
| 1.54 | 1 | 0 lm.nb |
| 4.95 | 1 | 0 lm.nb |
| 5.94 | 1 | 0 lm.nb |
| 4.75 | 1 | 0 lm.nb |
| 4.98 | 1 | 0 lm.nb |
| 1.73 | 1 | 0 lm.nb |
| 3.01 | 1 | 0 lm.nb |
| 4.21 | 1 | 0 lm.nb |
| 1.63 | 1 | 0 lm.nb |
| 2.9  | 1 | 0 lm.nb |
| 1.16 | 1 | 0 lm.nb |
| 2.79 | 1 | 0 lm.nb |
| 1.82 | 1 | 0 lm.nb |
| 1.22 | 1 | 0 lm.nb |
| 1.62 | 1 | 0 lm.nb |
| 1.3  | 1 | 0 lm.nb |
| 4.44 | 1 | 0 lm.nb |
| 1.99 | 1 | 0 lm.nb |
| 1.76 | 1 | 0 lm.nb |
| 1.42 | 1 | 0 lm.nb |
| 1.24 | 1 | 0 lm.nb |
| 2.48 | 1 | 0 lm.nb |
| 7.02 | 1 | 0 lm.nb |
| 2.04 | 1 | 0 lm.nb |
| 5.69 | 1 | 0 lm.nb |
| 5.54 | 1 | 0 lm.nb |
| 3.49 | 1 | 0 lm.nb |
| 1.52 | 1 | 0 lm.nb |
| 1.95 | 1 | 0 lm.nb |
| 5    | 1 | 0 lm.nb |
| 6.49 | 1 | 0 lm.nb |
| 2.45 | 1 | 0 lm.nb |
| 1.54 | 1 | 0 lm.nb |
| 1.78 | 1 | 0 lm.nb |
| 2.15 | 1 | 0 lm.nb |
| 1.46 | 1 | 0 lm.nb |
| 1.79 | 1 | 0 lm.nb |
| 2.25 | 1 | 0 lm.nb |

|      |   |         |
|------|---|---------|
| 6.17 | 1 | 0 lm.nb |
| 8.79 | 1 | 0 lm.nb |
| 3.14 | 1 | 0 lm.nb |
| 3.4  | 1 | 0 lm.nb |
| 2.23 | 1 | 0 lm.nb |
| 2.84 | 1 | 0 lm.nb |
| 4.06 | 1 | 0 lm.nb |
| 4.46 | 1 | 0 lm.nb |
| 1.29 | 1 | 0 lm.nb |
| 1.34 | 1 | 0 lm.nb |
| 1.28 | 1 | 0 lm.nb |
| 1.57 | 1 | 0 lm.nb |
| 1.91 | 1 | 0 lm.nb |
| 1.84 | 1 | 0 lm.nb |
| 1.51 | 1 | 0 lm.nb |
| 1.52 | 1 | 0 lm.nb |
| 1.54 | 1 | 0 lm.nb |
| 2.82 | 1 | 0 lm.nb |
| 2.99 | 1 | 0 lm.nb |
| 1.86 | 1 | 0 lm.nb |
| 2.58 | 1 | 0 lm.nb |
| 1.68 | 1 | 0 lm.nb |
| 4.76 | 1 | 0 lm.nb |
| 1.76 | 1 | 0 lm.nb |
| 3.12 | 1 | 0 lm.nb |
| 3.87 | 1 | 0 lm.nb |
| 2.9  | 1 | 0 lm.nb |
| 3.8  | 1 | 0 lm.nb |
| 1.37 | 1 | 0 lm.nb |
| 3.14 | 1 | 0 lm.nb |
| 1.85 | 1 | 0 lm.nb |
| 1.24 | 1 | 0 lm.nb |
| 1.42 | 1 | 0 lm.nb |
| 1.76 | 1 | 0 lm.nb |
| 2.02 | 1 | 0 lm.nb |
| 2.54 | 1 | 0 lm.nb |
| 1.84 | 1 | 0 lm.nb |
| 1.34 | 1 | 0 lm.nb |
| 2.23 | 1 | 0 lm.nb |
| 1.33 | 1 | 0 lm.nb |
| 5.08 | 1 | 0 lm.nb |
| 1.44 | 1 | 0 lm.nb |
| 1.95 | 1 | 0 lm.nb |
| 1.77 | 1 | 0 lm.nb |
| 1.21 | 1 | 0 lm.nb |
| 1.64 | 1 | 0 lm.nb |
| 2.02 | 1 | 0 lm.nb |

|      |   |             |
|------|---|-------------|
| 1.85 | 1 | 0 lm.nb     |
| 1.66 | 1 | 0 lm.nb     |
| 3.02 | 1 | 0 lm.nb     |
| 1.26 | 1 | 0 lm.nb     |
| 3.19 | 1 | 0 lm.nb     |
| 1.97 | 1 | 0 lm.nb     |
| 3.05 | 1 | 0 lm.nb     |
| 1.59 | 1 | 0 lm.nb     |
| 1.26 | 1 | 0 lm.nb     |
| 2.74 | 1 | 0 lm.nb     |
| 3.88 | 1 | 0 lm.nb     |
| 2.93 | 1 | 0 lm.nb     |
| 1.72 | 1 | 0 lm.nb     |
| 2.69 | 1 | 0 lm.nb     |
| 2.32 | 1 | 0 lm.nb     |
| 1.26 | 1 | 0 lm.nb     |
| 1.43 | 1 | 0 lm.nb     |
| 4.35 | 1 | 0 lm.nb     |
| 1.82 | 1 | 0 lm.nb     |
| 1.51 | 1 | 0 lm.nb     |
| 2.72 | 1 | 0 lm.nb     |
| 8    | 1 | 0 loglinear |
| 1.62 | 1 | 0 lm.nb     |
| 2.3  | 1 | 0 lm.nb     |
| 1.69 | 1 | 0 lm.nb     |
| 5.5  | 1 | 0 loglinear |
| 2.01 | 1 | 0 lm.nb     |
| 2.7  | 1 | 0 lm.nb     |
| 3.63 | 1 | 0 lm.nb     |
| 2.49 | 1 | 0 lm.nb     |
| 1.51 | 1 | 0 lm.nb     |
| 1.49 | 1 | 0 lm.nb     |
| 2.07 | 1 | 0 lm.nb     |
| 1.6  | 1 | 0 lm.nb     |
| 2.39 | 1 | 0 lm.nb     |
| 1.71 | 1 | 0 lm.nb     |
| 2.05 | 1 | 0 lm.nb     |
| 1.39 | 1 | 0 lm.nb     |
| 2.48 | 1 | 0 lm.nb     |
| 2.03 | 1 | 0 lm.nb     |
| 1.8  | 1 | 0 lm.nb     |
| 1.53 | 1 | 0 lm.nb     |
| 2.31 | 1 | 0 lm.nb     |
| 1.55 | 1 | 0 lm.nb     |
| 2.16 | 1 | 0 lm.nb     |
| 2    | 1 | 0 lm.nb     |
| 2.17 | 1 | 0 lm.nb     |

|      |   |             |
|------|---|-------------|
| 2.47 | 1 | 0 lm.nb     |
| 3.81 | 1 | 0 lm.nb     |
| 1.52 | 1 | 0 lm.nb     |
| 1.83 | 1 | 0 lm.nb     |
| 2.62 | 1 | 0 lm.nb     |
| 2.26 | 1 | 0 lm.nb     |
| 1.49 | 1 | 0 lm.nb     |
| 2.72 | 1 | 0 lm.nb     |
| 2.59 | 1 | 0 lm.nb     |
| 2.32 | 1 | 0 lm.nb     |
| 7.4  | 1 | 0 loglinear |
| 1.67 | 1 | 0 lm.nb     |
| 2.7  | 1 | 0 lm.nb     |
| 1.49 | 1 | 0 lm.nb     |
| 3    | 1 | 0 lm.nb     |
| 3.87 | 1 | 0 lm.nb     |
| 2.41 | 1 | 0 lm.nb     |
| 1.46 | 1 | 0 lm.nb     |
| 3.03 | 1 | 0 lm.nb     |
| 6.18 | 1 | 0 lm.nb     |
| 172  | 1 | 0 loglinear |
| 2.31 | 1 | 0 lm.nb     |
| 3.78 | 1 | 0 lm.nb     |
| 3.51 | 1 | 0 lm.nb     |
| 1.42 | 1 | 0 lm.nb     |
| 1.48 | 1 | 0 lm.nb     |
| 2.21 | 1 | 0 lm.nb     |
| 2.07 | 1 | 0 lm.nb     |
| 1.75 | 1 | 0 lm.nb     |
| 53.2 | 1 | 0 loglinear |
| 1.47 | 1 | 0 lm.nb     |
| 1.56 | 1 | 0 lm.nb     |
| 3.81 | 1 | 0 lm.nb     |
| 2.52 | 1 | 0 lm.nb     |
| 1.4  | 1 | 0 lm.nb     |
| 2.08 | 1 | 0 lm.nb     |
| 3.77 | 1 | 0 lm.nb     |
| 2.56 | 1 | 0 lm.nb     |
| 3.12 | 1 | 0 lm.nb     |
| 1.82 | 1 | 0 lm.nb     |
| 1.46 | 1 | 0 lm.nb     |
| 3.92 | 1 | 0 lm.nb     |
| 2.11 | 1 | 0 lm.nb     |
| 4.71 | 1 | 0 lm.nb     |
| 2.03 | 1 | 0 lm.nb     |
| 2.69 | 1 | 0 lm.nb     |
| 3.59 | 1 | 0 lm.nb     |

|      |   |             |
|------|---|-------------|
| 2.45 | 1 | 0 lm.nb     |
| 1.34 | 1 | 0 lm.nb     |
| 2.68 | 1 | 0 lm.nb     |
| 3.51 | 1 | 0 lm.nb     |
| 1.88 | 1 | 0 lm.nb     |
| 4.3  | 1 | 0 lm.nb     |
| 2    | 1 | 0 lm.nb     |
| 1.55 | 1 | 0 lm.nb     |
| 4.56 | 1 | 0 lm.nb     |
| 3.07 | 1 | 0 lm.nb     |
| 3.44 | 1 | 0 lm.nb     |
| 1.45 | 1 | 0 lm.nb     |
| 3.84 | 1 | 0 lm.nb     |
| 2.15 | 1 | 0 lm.nb     |
| 1.61 | 1 | 0 lm.nb     |
| 5.69 | 1 | 0 lm.nb     |
| 1.92 | 1 | 0 lm.nb     |
| 3.29 | 1 | 0 lm.nb     |
| 2.25 | 1 | 0 lm.nb     |
| 2.15 | 1 | 0 lm.nb     |
| 9.97 | 1 | 0 loglinear |
| 3.72 | 1 | 0 lm.nb     |
| 2.27 | 1 | 0 lm.nb     |
| 2.05 | 1 | 0 lm.nb     |
| 1.77 | 1 | 0 lm.nb     |
| 2.21 | 1 | 0 lm.nb     |
| 1.57 | 1 | 0 lm.nb     |
| 2.28 | 1 | 0 lm.nb     |
| 1.63 | 1 | 0 lm.nb     |
| 3.75 | 1 | 0 lm.nb     |
| 3.01 | 1 | 0 lm.nb     |
| 2.53 | 1 | 0 lm.nb     |
| 2.54 | 1 | 0 lm.nb     |
| 1.97 | 1 | 0 lm.nb     |
| 2.85 | 1 | 0 lm.nb     |
| 1.63 | 1 | 0 lm.nb     |

Gene.sets

Cytokine and Chemokine Signaling, Lymphoid Compartment

Antigen Presentation, Immune Cell Adhesion and Migration, Lymphoid Compartment

Cytotoxicity, Lymphoid Compartment

Cytokine and Chemokine Signaling, Myeloid Compartment

Interferon Signaling

Antigen Presentation, Cytotoxicity, Hypoxia, Interferon Signaling, JAK-STAT Signaling, Lymphoid Compartment, TG

Antigen Presentation

Cytokine and Chemokine Signaling, Lymphoid Compartment

Myeloid Compartment

Costimulatory Signaling, Cytokine and Chemokine Signaling, JAK-STAT Signaling, PI3K-Akt

Myeloid Compartment

Cytotoxicity, Lymphoid Compartment

Cytotoxicity, Lymphoid Compartment

Antigen Presentation, Cytokine and Chemokine Signaling

Cytokine and Chemokine Signaling

Antigen Presentation, Cytotoxicity, Lymphoid Compartment

Costimulatory Signaling, Lymphoid Compartment

Costimulatory Signaling, Immune Cell Adhesion and Migration

Apoptosis, Hypoxia, Myeloid Compartment, PI3K-Akt

Interferon Signaling

Apoptosis

Cytokine and Chemokine Signaling, JAK-STAT Signaling

Costimulatory Signaling, Cytokine and Chemokine Signaling, JAK-STAT Signaling, Lymphoid Compartment, PI3K-Ak

Cytotoxicity, Lymphoid Compartment

Lymphoid Compartment

Angiogenesis

Cytokine and Chemokine Signaling, Lymphoid Compartment

Cytokine and Chemokine Signaling

Costimulatory Signaling, Immune Cell Adhesion and Migration, Lymphoid Compartment

Immune Cell Adhesion and Migration, Matrix Remodeling and Metastasis

Cytokine and Chemokine Signaling, Myeloid Compartment

Costimulatory Signaling, Immune Cell Adhesion and Migration, Lymphoid Compartment

Apoptosis, Myeloid Compartment

Cytokine and Chemokine Signaling, Lymphoid Compartment

Cytotoxicity, MAPK, NF-kappaB Signaling, PI3K-Akt

Antigen Presentation, Matrix Remodeling and Metastasis

Cytokine and Chemokine Signaling, Cytotoxicity, Epigenetic Regulation, Interferon Signaling, JAK-STAT Signaling, L

Antigen Presentation, Hypoxia, Immune Cell Adhesion and Migration, Myeloid Compartment

Cytotoxicity, Lymphoid Compartment

Cytokine and Chemokine Signaling, Hypoxia, Immune Cell Adhesion and Migration, JAK-STAT Signaling, MAPK, Me

Costimulatory Signaling, Lymphoid Compartment  
Costimulatory Signaling, Lymphoid Compartment  
Cytotoxicity, Interferon Signaling, Lymphoid Compartment  
Costimulatory Signaling, Immune Cell Adhesion and Migration

Cell Proliferation, DNA Damage Repair  
Costimulatory Signaling, Myeloid Compartment  
Immune Cell Adhesion and Migration, Matrix Remodeling and Metastasis, Myeloid Compartment  
Metabolic Stress

Lymphoid Compartment

Cytokine and Chemokine Signaling, Myeloid Compartment  
Cytokine and Chemokine Signaling, Cytotoxicity, Interferon Signaling, JAK-STAT Signaling, Lymphoid Compartment

Myeloid Compartment  
Costimulatory Signaling, Lymphoid Compartment

Angiogenesis, Cell Proliferation, JAK-STAT Signaling, PI3K-Akt, Wnt Signaling  
Myeloid Compartment  
Apoptosis

Immune Cell Adhesion and Migration, Matrix Remodeling and Metastasis  
NF-kappaB Signaling  
Immune Cell Adhesion and Migration  
Myeloid Compartment

Antigen Presentation, Interferon Signaling  
Costimulatory Signaling, Immune Cell Adhesion and Migration, Lymphoid Compartment  
Antigen Presentation, Interferon Signaling, Myeloid Compartment  
Antigen Presentation, Interferon Signaling

Angiogenesis, Matrix Remodeling and Metastasis  
Costimulatory Signaling, Immune Cell Adhesion and Migration, Lymphoid Compartment  
Metabolic Stress  
MAPK, Matrix Remodeling and Metastasis, TGF-beta Signaling

Cytotoxicity, Lymphoid Compartment  
Immune Cell Adhesion and Migration, Matrix Remodeling and Metastasis  
Costimulatory Signaling, Immune Cell Adhesion and Migration, Lymphoid Compartment

Immune Cell Adhesion and Migration, Matrix Remodeling and Metastasis, PI3K-Akt  
Costimulatory Signaling, Immune Cell Adhesion and Migration, Lymphoid Compartment  
Costimulatory Signaling, Lymphoid Compartment  
Antigen Presentation, Apoptosis, Cell Proliferation, Costimulatory Signaling, Hedgehog Signaling, NF-kappaB Signaling

Antigen Presentation, Immune Cell Adhesion and Migration, Interferon Signaling  
Antigen Presentation, Costimulatory Signaling, Immune Cell Adhesion and Migration, Interferon Signaling  
Cytokine and Chemokine Signaling  
Apoptosis, MAPK, Myeloid Compartment  
Cytokine and Chemokine Signaling, MAPK, Myeloid Compartment, PI3K-Akt  
Cytotoxicity, Interferon Signaling  
Myeloid Compartment  
Cell Proliferation, Hypoxia, JAK-STAT Signaling, Metabolic Stress, Myeloid Compartment, PI3K-Akt  
Lymphoid Compartment  
Interferon Signaling  
DNA Damage Repair  
Antigen Presentation, MAPK, Metabolic Stress, NF-kappaB Signaling, TGF-beta Signaling  
Interferon Signaling  
Costimulatory Signaling

Costimulatory Signaling, Lymphoid Compartment, NF-kappaB Signaling

Epigenetic Regulation, Notch Signaling  
Antigen Presentation  
Antigen Presentation, Cytokine and Chemokine Signaling, Myeloid Compartment  
Lymphoid Compartment  
Antigen Presentation, Immune Cell Adhesion and Migration, Interferon Signaling  
Antigen Presentation, Immune Cell Adhesion and Migration, Interferon Signaling  
Immune Cell Adhesion and Migration, Interferon Signaling, Matrix Remodeling and Metastasis  
Costimulatory Signaling, Interferon Signaling, Matrix Remodeling and Metastasis  
Metabolic Stress

Cytokine and Chemokine Signaling, Cytotoxicity, JAK-STAT Signaling, PI3K-Akt

Myeloid Compartment, PI3K-Akt  
Costimulatory Signaling, JAK-STAT Signaling

Cytokine and Chemokine Signaling, Lymphoid Compartment

Autophagy, Cytokine and Chemokine Signaling, Hypoxia, Immune Cell Adhesion and Migration, JAK-STAT Signaling  
Cytokine and Chemokine Signaling, Myeloid Compartment  
Cytokine and Chemokine Signaling, Hypoxia, Immune Cell Adhesion and Migration, JAK-STAT Signaling, MAPK, Me  
Costimulatory Signaling  
Costimulatory Signaling  
Lymphoid Compartment  
Cytokine and Chemokine Signaling  
Immune Cell Adhesion and Migration, Matrix Remodeling and Metastasis, Myeloid Compartment  
Antigen Presentation  
Costimulatory Signaling, Lymphoid Compartment

Costimulatory Signaling, Lymphoid Compartment, MAPK

Antigen Presentation, Immune Cell Adhesion and Migration, Interferon Signaling  
Costimulatory Signaling, Immune Cell Adhesion and Migration, Lymphoid Compartment

NF-kappaB Signaling

Antigen Presentation, Interferon Signaling, JAK-STAT Signaling  
Cytokine and Chemokine Signaling, Cytotoxicity, JAK-STAT Signaling  
Antigen Presentation, Costimulatory Signaling, Immune Cell Adhesion and Migration, Interferon Signaling

Metabolic Stress

Antigen Presentation, Immune Cell Adhesion and Migration, Interferon Signaling  
Antigen Presentation, Costimulatory Signaling, Immune Cell Adhesion and Migration, Interferon Signaling  
Costimulatory Signaling, Lymphoid Compartment  
Cytotoxicity, Interferon Signaling

Immune Cell Adhesion and Migration, Myeloid Compartment

Cytotoxicity, Interferon Signaling  
Costimulatory Signaling  
Cytotoxicity, Interferon Signaling

Cytokine and Chemokine Signaling, JAK-STAT Signaling, PI3K-Akt  
Antigen Presentation

Cytotoxicity, DNA Damage Repair, Interferon Signaling, Lymphoid Compartment  
MAPK, NF-kappaB Signaling  
Cytotoxicity, Interferon Signaling, Lymphoid Compartment  
Epigenetic Regulation, MAPK  
Antigen Presentation, Immune Cell Adhesion and Migration  
Myeloid Compartment  
Interferon Signaling  
Interferon Signaling  
Interferon Signaling  
Myeloid Compartment

Apoptosis, Autophagy, Hypoxia, JAK-STAT Signaling, PI3K-Akt  
Cytotoxicity, Interferon Signaling  
Myeloid Compartment  
Costimulatory Signaling, Immune Cell Adhesion and Migration  
Epigenetic Regulation  
Costimulatory Signaling  
Apoptosis, Cytotoxicity  
Antigen Presentation, Costimulatory Signaling, Immune Cell Adhesion and Migration  
Immune Cell Adhesion and Migration, Lymphoid Compartment, Matrix Remodeling and Metastasis, PI3K-Akt

Matrix Remodeling and Metastasis

Immune Cell Adhesion and Migration

Cytokine and Chemokine Signaling

Notch Signaling

Myeloid Compartment

Apoptosis, Autophagy

Autophagy, Costimulatory Signaling, Hypoxia, JAK-STAT Signaling, Metabolic Stress, PI3K-Akt

Autophagy, Metabolic Stress, PI3K-Akt

NF-kappaB Signaling

Antigen Presentation, Myeloid Compartment

Cytokine and Chemokine Signaling

Costimulatory Signaling, Cytokine and Chemokine Signaling, Hypoxia, MAPK, Metabolic Stress, NF-kappaB Signaling

Apoptosis

PI3K-Akt

Cytokine and Chemokine Signaling, MAPK, Myeloid Compartment

Interferon Signaling

Apoptosis, PI3K-Akt

Cell Proliferation, Metabolic Stress

DNA Damage Repair

Cell Proliferation, Metabolic Stress, PI3K-Akt

TGF-beta Signaling

Angiogenesis, Immune Cell Adhesion and Migration, Matrix Remodeling and Metastasis

Cell Proliferation, Hypoxia, Immune Cell Adhesion and Migration, MAPK, Matrix Remodeling and Metastasis, Metabolic Stress

Interferon Signaling

Angiogenesis

Cytotoxicity, Interferon Signaling

Costimulatory Signaling, Cytokine and Chemokine Signaling, NF-kappaB Signaling

Cytokine and Chemokine Signaling, MAPK, Myeloid Compartment, PI3K-Akt

Costimulatory Signaling, Wnt Signaling

Epigenetic Regulation

Autophagy, Costimulatory Signaling, MAPK, Wnt Signaling

Cytotoxicity, Interferon Signaling

Metabolic Stress

Hedgehog Signaling, Wnt Signaling

Lymphoid Compartment

Antigen Presentation, Apoptosis, Cell Proliferation, Costimulatory Signaling, Hedgehog Signaling, Interferon Signaling

Cytokine and Chemokine Signaling, JAK-STAT Signaling, Myeloid Compartment, PI3K-Akt  
Myeloid Compartment  
Immune Cell Adhesion and Migration  
DNA Damage Repair

Immune Cell Adhesion and Migration, Matrix Remodeling and Metastasis  
Myeloid Compartment

Cytotoxicity, Interferon Signaling, Lymphoid Compartment

Autophagy, Costimulatory Signaling, Cytokine and Chemokine Signaling, Hypoxia, Immune Cell Adhesion and Migr  
Antigen Presentation, Costimulatory Signaling, Immune Cell Adhesion and Migration, Interferon Signaling  
Cell Proliferation, JAK-STAT Signaling, PI3K-Akt, Wnt Signaling  
Metabolic Stress

Autophagy, Hypoxia, Metabolic Stress, PI3K-Akt, TGF-beta Signaling

Antigen Presentation, Immune Cell Adhesion and Migration

Cytokine and Chemokine Signaling, Hypoxia, JAK-STAT Signaling, Metabolic Stress, PI3K-Akt  
MAPK  
Angiogenesis, MAPK, PI3K-Akt  
Cytotoxicity, Interferon Signaling  
MAPK, Metabolic Stress, PI3K-Akt  
Metabolic Stress, PI3K-Akt  
Lymphoid Compartment  
Costimulatory Signaling, Immune Cell Adhesion and Migration, Lymphoid Compartment

NF-kappaB Signaling

Cytokine and Chemokine Signaling, Myeloid Compartment  
Cell Proliferation, Metabolic Stress  
Antigen Presentation, Apoptosis, Cell Proliferation, Costimulatory Signaling, Hedgehog Signaling, NF-kappaB Signa  
Lymphoid Compartment, PI3K-Akt  
Lymphoid Compartment  
Apoptosis, Autophagy, MAPK, PI3K-Akt  
Autophagy, Metabolic Stress, PI3K-Akt  
NF-kappaB Signaling

Notch Signaling  
Antigen Presentation  
Costimulatory Signaling, Cytokine and Chemokine Signaling, JAK-STAT Signaling

Immune Cell Adhesion and Migration

Angiogenesis

Cell Proliferation, DNA Damage Repair, Metabolic Stress

Immune Cell Adhesion and Migration

Immune Cell Adhesion and Migration, Myeloid Compartment

Autophagy, Cytokine and Chemokine Signaling, Hedgehog Signaling, MAPK, Wnt Signaling

Cytokine and Chemokine Signaling

Antigen Presentation, Apoptosis, Cell Proliferation, Costimulatory Signaling, Hedgehog Signaling, NF-kappaB Signaling, Metabolic Stress

Cytotoxicity, Interferon Signaling

Hypoxia, Interferon Signaling, JAK-STAT Signaling

Hypoxia, Metabolic Stress

Cell Proliferation, Metabolic Stress, TGF-beta Signaling

Metabolic Stress

Notch Signaling

Cytotoxicity, Interferon Signaling, Lymphoid Compartment

Autophagy, Cytokine and Chemokine Signaling, MAPK, Metabolic Stress, PI3K-Akt

MAPK

Cell Proliferation

Hedgehog Signaling, Wnt Signaling

Angiogenesis, Hypoxia, MAPK, Metabolic Stress, PI3K-Akt

Antigen Presentation, Notch Signaling

Immune Cell Adhesion and Migration, Lymphoid Compartment

Angiogenesis, MAPK, Metabolic Stress, PI3K-Akt

DNA Damage Repair

Notch Signaling

Myeloid Compartment

Interferon Signaling

Metabolic Stress

Myeloid Compartment

Cytotoxicity, Interferon Signaling, JAK-STAT Signaling, Lymphoid Compartment

MAPK, NF-kappaB Signaling

Epigenetic Regulation

MAPK

Angiogenesis, MAPK, PI3K-Akt

Angiogenesis, Antigen Presentation, Immune Cell Adhesion and Migration, Matrix Remodeling and Metastasis, PI3K-Akt

Angiogenesis

Angiogenesis

Autophagy, Hypoxia, Metabolic Stress, Notch Signaling

Myeloid Compartment

Costimulatory Signaling, Matrix Remodeling and Metastasis, PI3K-Akt

Cell Proliferation

Epigenetic Regulation, Notch Signaling  
Cell Proliferation, DNA Damage Repair, Metabolic Stress

Cytotoxicity, Interferon Signaling, Lymphoid Compartment  
Angiogenesis  
Apoptosis, Cell Proliferation, DNA Damage Repair, MAPK, Metabolic Stress, Notch Signaling, PI3K-Akt, Wnt Signaling  
Apoptosis  
Interferon Signaling, JAK-STAT Signaling, PI3K-Akt  
Epigenetic Regulation, Notch Signaling  
Matrix Remodeling and Metastasis  
Cytotoxicity, Interferon Signaling  
Metabolic Stress  
Antigen Presentation, Interferon Signaling  
Costimulatory Signaling, Cytokine and Chemokine Signaling  
Matrix Remodeling and Metastasis, PI3K-Akt  
Antigen Presentation, DNA Damage Repair, Interferon Signaling  
Antigen Presentation, Cell Proliferation  
Immune Cell Adhesion and Migration, Matrix Remodeling and Metastasis, PI3K-Akt  
NF-kappaB Signaling  
Apoptosis, Immune Cell Adhesion and Migration, Wnt Signaling  
  
MAPK, TGF-beta Signaling

Immune Cell Adhesion and Migration, Matrix Remodeling and Metastasis, PI3K-Akt  
Immune Cell Adhesion and Migration  
Cell Proliferation, DNA Damage Repair, Metabolic Stress  
Cell Proliferation, DNA Damage Repair, JAK-STAT Signaling  
Autophagy, Costimulatory Signaling, Metabolic Stress, PI3K-Akt  
Autophagy, Costimulatory Signaling, Cytokine and Chemokine Signaling, Hypoxia, Immune Cell Adhesion and Migration  
Costimulatory Signaling, NF-kappaB Signaling  
Antigen Presentation, Matrix Remodeling and Metastasis  
Hypoxia, MAPK, Metabolic Stress, PI3K-Akt

Autophagy, Epigenetic Regulation  
Hypoxia, Metabolic Stress  
Immune Cell Adhesion and Migration, Interferon Signaling, Matrix Remodeling and Metastasis  
Antigen Presentation, Immune Cell Adhesion and Migration  
Cytokine and Chemokine Signaling, MAPK  
Cytokine and Chemokine Signaling, Cytotoxicity, Interferon Signaling, JAK-STAT Signaling, Lymphoid Compartment

Matrix Remodeling and Metastasis  
Costimulatory Signaling, Cytokine and Chemokine Signaling, MAPK, NF-kappaB Signaling, PI3K-Akt  
Interferon Signaling, MAPK  
Cytokine and Chemokine Signaling, Lymphoid Compartment  
MAPK, TGF-beta Signaling

Antigen Presentation

MAPK, Matrix Remodeling and Metastasis, TGF-beta Signaling

Cytokine and Chemokine Signaling, Immune Cell Adhesion and Migration

Myeloid Compartment

Costimulatory Signaling, MAPK

Costimulatory Signaling, Cytokine and Chemokine Signaling, MAPK, NF-kappaB Signaling, PI3K-Akt  
MAPK

Apoptosis

Costimulatory Signaling, Metabolic Stress

MAPK

Cell Proliferation, DNA Damage Repair, PI3K-Akt

Apoptosis, Cytokine and Chemokine Signaling, Immune Cell Adhesion and Migration, TGF-beta Signaling

Apoptosis

Cytotoxicity, Interferon Signaling

Immune Cell Adhesion and Migration, Matrix Remodeling and Metastasis

NF-kappaB Signaling

Cell Proliferation

Myeloid Compartment

Autophagy, Cytokine and Chemokine Signaling, MAPK, Metabolic Stress, PI3K-Akt

Apoptosis

Wnt Signaling

Angiogenesis, Immune Cell Adhesion and Migration, Matrix Remodeling and Metastasis

Cell Proliferation

Cytotoxicity, Interferon Signaling, Lymphoid Compartment

DNA Damage Repair

DNA Damage Repair

Epigenetic Regulation, Notch Signaling

Angiogenesis, Cell Proliferation, Metabolic Stress, Notch Signaling

DNA Damage Repair

Costimulatory Signaling

Costimulatory Signaling, Lymphoid Compartment

Cell Proliferation, PI3K-Akt, TGF-beta Signaling

Lymphoid Compartment

MAPK, NF-kappaB Signaling

Apoptosis, Cytotoxicity

Costimulatory Signaling, Immune Cell Adhesion and Migration

Cytokine and Chemokine Signaling, Hypoxia, JAK-STAT Signaling, PI3K-Akt

DNA Damage Repair

Metabolic Stress, PI3K-Akt

Apoptosis  
Immune Cell Adhesion and Migration  
Cell Proliferation, DNA Damage Repair, Metabolic Stress

Hedgehog Signaling, Wnt Signaling  
Epigenetic Regulation  
Epigenetic Regulation, Notch Signaling

Cell Proliferation, DNA Damage Repair  
DNA Damage Repair  
Metabolic Stress  
Matrix Remodeling and Metastasis, TGF-beta Signaling  
Wnt Signaling

Wnt Signaling  
Cytotoxicity, Interferon Signaling, JAK-STAT Signaling, Lymphoid Compartment, PI3K-Akt  
Hypoxia, Metabolic Stress, PI3K-Akt  
Costimulatory Signaling, Cytokine and Chemokine Signaling, MAPK, Metabolic Stress, NF-kappaB Signaling, PI3K-A  
Angiogenesis  
Apoptosis, Autophagy, Costimulatory Signaling, Cytokine and Chemokine Signaling, Hypoxia, JAK-STAT Signaling, N  
Immune Cell Adhesion and Migration, Interferon Signaling, Matrix Remodeling and Metastasis  
Notch Signaling  
Matrix Remodeling and Metastasis, Wnt Signaling  
Notch Signaling

Cytokine and Chemokine Signaling, Metabolic Stress  
Cell Proliferation, DNA Damage Repair  
Metabolic Stress  
Metabolic Stress

Costimulatory Signaling, Cytokine and Chemokine Signaling, Hypoxia, MAPK, Metabolic Stress, NF-kappaB Signaling  
Autophagy, Cytokine and Chemokine Signaling, JAK-STAT Signaling, MAPK, Metabolic Stress, PI3K-Akt  
Cell Proliferation, DNA Damage Repair  
DNA Damage Repair  
MAPK  
Notch Signaling  
Apoptosis, MAPK, Matrix Remodeling and Metastasis  
Hypoxia  
Matrix Remodeling and Metastasis, Myeloid Compartment, PI3K-Akt  
Cell Proliferation  
Hypoxia, Metabolic Stress  
Apoptosis, Immune Cell Adhesion and Migration, Matrix Remodeling and Metastasis

Matrix Remodeling and Metastasis, PI3K-Akt  
Antigen Presentation, Cell Proliferation  
Metabolic Stress, Myeloid Compartment  
Apoptosis, Cell Proliferation

Cell Proliferation  
Cell Proliferation, DNA Damage Repair, Epigenetic Regulation, Metabolic Stress  
Cytokine and Chemokine Signaling, Myeloid Compartment  
Cell Proliferation, JAK-STAT Signaling, MAPK, Metabolic Stress, Notch Signaling, PI3K-Akt, TGF-beta Signaling, Wnt  
Myeloid Compartment  
Myeloid Compartment

Hypoxia, Metabolic Stress  
Metabolic Stress  
Costimulatory Signaling, Lymphoid Compartment, NF-kappaB Signaling  
Antigen Presentation, Immune Cell Adhesion and Migration, Lymphoid Compartment

Cell Proliferation, DNA Damage Repair, Metabolic Stress, PI3K-Akt  
TGF-beta Signaling  
Hedgehog Signaling, Wnt Signaling  
Antigen Presentation, Costimulatory Signaling, Immune Cell Adhesion and Migration, Interferon Signaling  
Cell Proliferation  
Cytokine and Chemokine Signaling, Myeloid Compartment  
Cell Proliferation  
Cell Proliferation, DNA Damage Repair  
Cytokine and Chemokine Signaling, Hypoxia, JAK-STAT Signaling, Metabolic Stress  
Hypoxia, Interferon Signaling, JAK-STAT Signaling  
Autophagy, Costimulatory Signaling, Cytokine and Chemokine Signaling, Hypoxia, Immune Cell Adhesion and Migr

Antigen Presentation, Costimulatory Signaling, Immune Cell Adhesion and Migration, Interferon Signaling  
Apoptosis, Autophagy, JAK-STAT Signaling, MAPK, PI3K-Akt  
Epigenetic Regulation  
Angiogenesis

Antigen Presentation, Hypoxia, Metabolic Stress

Myeloid Compartment  
Costimulatory Signaling, Immune Cell Adhesion and Migration, Lymphoid Compartment, NF-kappaB Signaling  
Hedgehog Signaling  
Hypoxia, Metabolic Stress  
Angiogenesis, Epigenetic Regulation, Metabolic Stress  
NF-kappaB Signaling  
MAPK, Metabolic Stress  
Cytokine and Chemokine Signaling, Myeloid Compartment

Angiogenesis, Hypoxia, MAPK, PI3K-Akt  
Angiogenesis, Matrix Remodeling and Metastasis, PI3K-Akt, TGF-beta Signaling

## Cytokine and Chemokine Signaling, Lymphoid Compartment

Cytotoxicity

DNA Damage Repair

Myeloid Compartment

Angiogenesis

Apoptosis, Wnt Signaling

Antigen Presentation, Cytokine and Chemokine Signaling, Myeloid Compartment

Cell Proliferation, Epigenetic Regulation, JAK-STAT Signaling, Notch Signaling, PI3K-Akt, Wnt Signaling

Matrix Remodeling and Metastasis, PI3K-Akt

Hypoxia, Metabolic Stress

Angiogenesis, Cell Proliferation, Metabolic Stress, PI3K-Akt

Hypoxia, Metabolic Stress

Cell Proliferation, DNA Damage Repair

Cytotoxicity

NF-kappaB Signaling

Apoptosis

DNA Damage Repair

Costimulatory Signaling, Metabolic Stress

Cytotoxicity, JAK-STAT Signaling, Myeloid Compartment

Cell Proliferation

Cell Proliferation

Angiogenesis, Notch Signaling

Apoptosis, Cell Proliferation, DNA Damage Repair

Autophagy, Metabolic Stress

Hypoxia, Metabolic Stress

Cytotoxicity, Myeloid Compartment

Epigenetic Regulation, Metabolic Stress

Antigen Presentation, Cell Proliferation, Metabolic Stress

Apoptosis

Costimulatory Signaling, Interferon Signaling, Lymphoid Compartment

Cytotoxicity, Matrix Remodeling and Metastasis, Myeloid Compartment

Metabolic Stress

Costimulatory Signaling, Immune Cell Adhesion and Migration, Interferon Signaling, JAK-STAT Signaling, MAPK

probe.ID

NM\_002416.2:2012  
NM\_005601.3:633  
NM\_001768.6:2029  
NM\_006144.3:215  
NM\_002985.2:277  
NM\_052941.4:1761  
NM\_000619.2:450  
NM\_001335.3:1075  
NM\_006419.2:209  
NM\_003897.3:204  
NM\_000878.2:1980  
NM\_000239.2:381  
NM\_001031680.2:3786  
NM\_007360.3:522  
NM\_018326.2:315  
NM\_002258.2:85  
NM\_000579.3:366  
NM\_001256370.1:1094  
NM\_006564.1:97  
NM\_002262.3:393  
NR\_024115.1:2175  
NM\_000732.4:127  
NM\_025239.3:235  
NR\_024168.1:2575  
NM\_002053.2:1838  
NM\_004324.3:330  
NM\_000491.3:816  
NM\_001558.2:150  
NM\_000206.1:595  
NM\_033423.3:705  
NM\_005816.4:1355  
NM\_001113755.2:645  
NM\_001565.3:122  
NM\_004221.4:358  
NM\_001767.3:683  
NM\_002209.2:3905  
NM\_001172129.1:325  
NM\_001037631.2:392  
NM\_001195797.1:135  
NM\_005409.4:333  
NM\_000639.2:605  
NM\_004079.3:685  
NM\_004972.2:455  
NM\_000397.3:1034  
NM\_002104.2:634  
NM\_001282426.1:1805

NM\_000073.2:404  
NM\_002286.5:1736  
NM\_002460.1:325  
NM\_080921.3:99  
NM\_001561.5:567  
NM\_058216.2:15  
NM\_001278405.1:256  
NM\_000887.4:561  
NM\_000289.5:2672  
NM\_015991.3:636  
NM\_001775.2:280  
NM\_080921.3:258  
NM\_002982.3:303  
NM\_007315.3:239  
NM\_001171653.1:1879  
NM\_001244871.1:2475  
NM\_005356.4:1723  
NM\_001098175.1:1418  
NM\_001759.2:5825  
NM\_002003.4:969  
NM\_001223.4:1050  
NM\_001251.2:1140  
NM\_000442.4:2492  
NM\_001066.2:596  
NM\_172004.3:357  
NM\_002030.4:733  
NM\_002065.6:1485  
NM\_001278426.3:591  
NM\_004048.2:573  
NM\_012092.3:591  
NM\_000566.3:561  
NM\_002163.2:1245  
NM\_001184879.1:1015  
NM\_001207014.1:1850  
NM\_001243077.1:438  
NM\_001127628.1:488  
NM\_000660.4:1473  
NM\_000570.4:255  
NM\_001289023.2:864  
NM\_012483.3:540  
NM\_000211.3:1412  
NM\_005191.3:674  
NM\_152852.2:146  
NM\_000885.5:1019  
NM\_173799.2:1968  
NM\_000733.3:233  
NM\_002800.4:394

NM\_005516.5:1287  
NM\_002121.5:987  
NM\_004513.4:1262  
NM\_001174105.1:1020  
NM\_005211.3:958  
NM\_016817.2:380  
NM\_018965.3:848  
NM\_000389.2:1975  
NM\_006137.6:440  
NM\_003733.2:1570  
NM\_000179.2:1015  
NM\_000594.3:1366  
NM\_004120.4:1744  
NM\_016388.3:578  
ENST00000367367.1:131  
NM\_001242.4:326  
NM\_001243266.1:692  
NM\_001278318.1:486  
NM\_001015053.1:2169  
NM\_000593.5:1000  
NM\_002984.2:35  
NM\_001346456.1:1526  
NM\_005514.6:1247  
NM\_002117.4:898  
NM\_001078.3:2535  
NM\_001001392.1:566  
NM\_001256841.1:371  
NM\_001270508.1:3240  
NM\_000215.2:1715  
NM\_001276501.1:915  
NM\_001318787.1:484  
NM\_001243835.1:808  
NM\_024649.4:82  
NM\_005508.4:672  
NM\_001190945.1:712  
NM\_001350234.1:664  
NM\_005623.2:1012  
NM\_014308.3:3275  
NM\_001781.2:88  
NM\_032782.3:955  
NM\_001278182.1:1522  
NM\_021006.5:411  
NM\_000632.3:1400  
NM\_018833.2:912  
NM\_001778.3:413  
NM\_021642.3:60  
NM\_001079.3:1175

NM\_002116.7:298  
NM\_001206924.1:1685  
NM\_001114937.2:418  
NM\_002341.1:330  
NM\_001061.4:709  
NM\_001145457.2:409  
NM\_000041.2:96  
NM\_003745.1:1022  
NM\_147162.1:400  
NM\_002124.3:1016  
NM\_004072.2:762  
NM\_000920.3:262  
NM\_001098479.1:285  
NM\_033554.2:857  
NM\_001033667.2:339  
NM\_001032409.1:805  
NM\_000958.2:975  
NM\_032206.4:3668  
NM\_197954.2:55  
NM\_203416.2:1784  
NM\_005533.4:729  
NM\_024070.3:1390  
NM\_002198.2:557  
NM\_001002273.1:870  
NM\_002185.3:1355  
NM\_001025159.2:1161  
NM\_005165.2:335  
NM\_005101.3:305  
NM\_006509.3:956  
NM\_001144925.2:1369  
NM\_006301.3:2680  
NM\_002118.3:20  
NM\_023914.2:2350  
NM\_004029.2:1705  
NM\_002199.3:1624  
NM\_001197122.1:607  
NM\_002543.3:254  
NM\_001005291.1:1392  
NM\_000633.2:1525  
NM\_006187.3:2354  
NM\_003263.3:696  
NM\_001253849.1:871  
NM\_007371.3:2621  
NM\_002037.5:2125  
NM\_014417.4:1310  
NM\_000616.4:1524  
NM\_181501.1:502

NM\_000014.4:1685  
NM\_001244.3:399  
NM\_023068.3:4559  
NM\_001123041.2:438  
NM\_002405.3:1768  
NM\_001134836.1:600  
NM\_001001523.1:2839  
NM\_002308.3:1206  
NM\_001699.4:1535  
NM\_016562.3:4120  
NM\_002128.5:3400  
NM\_004958.3:3444  
NM\_001163034.1:3139  
NM\_001145645.2:142  
NM\_002438.2:525  
NM\_001171171.1:2625  
NM\_018295.3:377  
NM\_002468.3:2145  
NM\_021975.3:1990  
NM\_001034116.1:1258  
NM\_003824.3:810  
NM\_003177.5:808  
NM\_000576.2:1122  
NM\_002200.3:1845  
XM\_011542270.1:326  
NM\_000077.4:1052  
NM\_030641.3:289  
NM\_002995.2:266  
NM\_001145306.1:1373  
NM\_005903.5:5007  
NM\_004994.2:2011  
NM\_002737.2:818  
NM\_080657.4:1057  
NM\_024756.2:3040  
NM\_001547.4:1995  
NM\_020529.2:1361  
NM\_000757.5:251  
NM\_173091.2:1840  
NM\_001130823.2:2500  
NM\_003188.3:1178  
NM\_001146055.1:480  
NM\_022168.3:3250  
NM\_014905.4:165  
NM\_003392.3:987  
NM\_021950.3:161  
NM\_004159.4:1080  
NM\_022162.1:4080

NM\_000760.3:2066  
NM\_002029.3:625  
NM\_006288.3:420  
NM\_000251.1:2514  
NM\_014862.3:1133  
NM\_002162.3:1225  
NM\_001127702.1:963  
NM\_001100122.1:1686  
NM\_005532.3:390  
NM\_001330347.1:2169  
NM\_005027.3:344  
NM\_019111.3:335  
NM\_001136017.2:760  
NM\_002080.3:674  
NM\_001146103.1:1188  
NM\_017654.3:490  
NM\_001272042.1:2451  
NM\_022153.1:185  
NM\_001114614.1:328  
NM\_017734.4:224  
NM\_006120.3:396  
NM\_004107.4:1260  
NM\_000600.3:484  
NM\_004418.3:1235  
NM\_003377.3:687  
NM\_001031683.3:712  
NM\_000245.2:1488  
NM\_005627.3:1621  
NM\_001783.3:618  
NM\_015259.4:1190  
NM\_001145847.1:596  
NM\_001270949.1:1940  
NM\_022750.3:1843  
NM\_000577.3:480  
NM\_000321.2:2769  
NM\_001130725.1:426  
NM\_001770.4:1770  
NM\_002164.5:52  
NM\_004322.3:963  
NM\_006252.3:4014  
NM\_003809.2:339  
NM\_000917.3:805  
NM\_017617.3:2999  
NM\_003190.4:1082  
NM\_000585.4:715  
NM\_003200.3:276  
NM\_002855.4:357

NM\_001289999.1:1466  
NM\_001111045.1:892  
NM\_001024736.1:2119  
NM\_013252.2:615  
NM\_000247.1:550  
NM\_182948.2:805  
NM\_002988.3:45  
NM\_002801.3:249  
NM\_003051.3:635  
NM\_002038.3:410  
NM\_005534.3:1963  
NM\_004448.2:2405  
NM\_015441.1:2920  
NM\_004936.3:906  
NM\_002079.2:568  
NM\_015177.1:4820  
NM\_001270930.1:1675  
NM\_004985.3:1790  
NM\_004419.3:675  
NM\_001034.1:490  
NM\_025216.2:1781  
NM\_001171623.1:2212  
NM\_138287.3:1543  
NM\_001135768.2:448  
NM\_001174064.1:1756  
NM\_000535.6:894  
NM\_024408.3:2842  
NM\_001284403.1:326  
NM\_001008541.1:2037  
NM\_001199723.1:802  
NM\_001135652.2:516  
NM\_001206796.2:1533  
NM\_002964.4:365  
NM\_006084.4:723  
NM\_138441.2:1198  
NM\_001077494.3:1986  
NM\_006015.4:1670  
NM\_000267.3:1260  
NM\_003862.2:1030  
NM\_001144999.2:2701  
NM\_000972.2:657  
NM\_001142593.2:958  
NM\_181054.2:930  
NM\_000063.5:730  
NM\_005764.3:229  
NM\_000582.2:760  
NM\_018131.3:570

NM\_001330636.1:865  
NM\_002485.4:1046  
NM\_002354.2:499  
NM\_003641.3:536  
NM\_000366.5:830  
NM\_000546.2:1330  
NM\_006871.3:1072  
NM\_000629.2:461  
NM\_003884.4:1180  
NM\_000093.4:1133  
NM\_001206567.1:2351  
NM\_003486.6:2011  
NM\_003141.3:1190  
NM\_001243211.1:392  
NM\_000495.4:1714  
NM\_003335.2:580  
NM\_001255.1:915  
NM\_002214.2:2609  
NM\_004556.2:876  
NM\_001098209.1:1938  
NM\_005985.3:960  
NM\_001130916.2:3011  
NM\_001322977.1:191  
NM\_001797.2:152  
NM\_001316306.1:1982  
NM\_001144822.1:42  
NM\_000051.3:393  
NM\_015897.2:454  
NM\_000314.6:6696  
NM\_006218.2:3296  
NM\_003820.3:503  
NM\_001001548.2:705  
NM\_005228.3:2760  
NM\_005931.3:1387  
NM\_001165136.1:883  
NM\_004052.3:116  
NM\_002610.3:401  
NM\_000615.6:1134  
NM\_002119.3:3075  
NR\_048564.1:949  
NM\_005419.2:1965  
NM\_001284244.1:241  
NM\_182943.2:2588  
NM\_001278.4:3263  
NM\_001164319.1:8980  
NM\_002996.3:1850  
NM\_001024847.2:870

NM\_001674.3:1487  
NM\_001135599.3:1972  
NM\_001008540.1:1060  
NM\_000578.3:1679  
NM\_001244134.1:493  
NM\_001099856.4:1719  
NM\_004417.3:1428  
NM\_003842.3:565  
NM\_001285439.1:117  
NM\_001193520.1:3097  
NM\_014805.3:1322  
NM\_152275.3:2492  
NM\_007294.3:4677  
NM\_005406.2:3796  
NM\_001196.3:1604  
NM\_006435.2:390  
NM\_002208.4:3647  
NM\_001297562.1:332  
NM\_014791.2:365  
NM\_138636.4:2210  
NM\_001330491.1:2559  
NM\_002524.4:2168  
NM\_003294.3:556  
NM\_182919.3:2552  
NM\_181050.1:2742  
NM\_001126336.2:394  
NM\_002417.2:2005  
NM\_002033.3:1151  
NM\_000876.2:7820  
NM\_000107.2:1556  
NM\_001018112.1:580  
NM\_005271.2:2680  
NM\_006037.3:3742  
NM\_001243076.2:2707  
NM\_024608.2:1675  
NM\_003821.5:1306  
NM\_001935.3:1861  
NM\_001323611.1:1085  
NM\_005242.4:1388  
NM\_001065.2:515  
NM\_003810.3:155  
NM\_001042724.1:1120  
NM\_000565.3:846  
NM\_032043.2:1570  
NM\_001146282.1:951  
NM\_000125.2:1595  
NM\_001018073.2:1307

NM\_001172699.1:1010  
NM\_001228.4:762  
NM\_001792.3:3067  
NM\_005732.3:1357  
NM\_198282.1:725  
NM\_007108.2:800  
NM\_001291880.1:1169  
NM\_001289067.1:191  
NM\_003883.3:1464  
NM\_001318204.1:674  
NM\_000059.3:1373  
NM\_002412.3:323  
NM\_014584.2:963  
NM\_000627.3:1970  
NM\_031866.1:890  
NM\_001044305.2:823  
NM\_002822.4:1574  
NM\_001448.2:820  
NM\_002227.1:285  
NM\_004095.3:673  
NM\_001190720.2:1891  
NM\_001039667.2:1088  
NM\_005163.2:2207  
NM\_000201.2:2253  
NM\_032427.1:4125  
NM\_002423.3:265  
NM\_001145646.1:541  
NM\_025079.2:1379  
NM\_000584.3:170  
NM\_006027.3:820  
NM\_000365.5:153  
NM\_001145144.1:648  
NM\_024908.3:1875  
NM\_001017973.1:1748  
NM\_003998.3:2920  
NM\_005343.3:842  
NM\_133487.3:1570  
NM\_006437.3:1399  
NM\_000043.3:90  
NM\_005524.2:860  
NM\_032991.2:1002  
NM\_000034.3:2049  
NM\_000228.2:3350  
NM\_000076.2:1605  
NM\_006516.2:264  
NM\_004360.3:379  
NM\_014373.1:760

NM\_004369.3:3293  
NM\_006845.2:1020  
NM\_005194.3:1731  
NM\_001168.2:1215  
NM\_001128128.2:2292  
NM\_018685.2:240  
NM\_002105.2:521  
NM\_002090.2:467  
NM\_002467.3:1615  
NM\_001242589.2:101  
NM\_001657.3:717  
NM\_000978.3:100  
NM\_004566.3:1925  
NM\_001174097.2:1200  
NM\_148970.1:151  
NM\_002120.3:124  
NM\_001124.2:1413  
NM\_001290230.1:1543  
NM\_001546.3:2048  
XM\_011545241.2:1015  
NM\_002122.3:258  
NM\_031966.2:710  
NM\_002089.1:435  
NM\_016343.3:9260  
NM\_000249.2:1605  
NM\_003150.3:2936  
NM\_000416.2:1025  
NM\_001242466.1:889  
NM\_003268.5:2570  
NM\_002123.3:384  
NM\_001191.3:1421  
NM\_001330384.1:2083  
NM\_005860.2:255  
NM\_002526.3:3526  
NM\_198156.1:420  
NM\_001172.3:512  
NM\_002965.3:137  
NM\_001250.5:166  
NM\_002048.2:948  
NM\_001135239.1:1053  
NM\_004456.4:1596  
NM\_002546.3:572  
NM\_005923.3:3371  
NM\_001130046.1:295  
NM\_018009.4:1425  
NM\_002019.4:530  
NM\_003246.2:3816

NM\_001100812.1:743  
NM\_001142930.1:1552  
NM\_001031709.2:726  
NM\_001130852.1:657  
NM\_003747.2:1948  
NM\_006770.3:1435  
NM\_001300927.1:6607  
NM\_001127510.2:462  
NM\_001511.3:743  
NM\_053056.2:857  
NM\_005562.2:1027  
NM\_000188.2:3355  
NM\_001238.1:1155  
NM\_000189.4:2883  
NM\_001256849.1:1356  
NM\_030964.3:1900  
NM\_003808.3:810  
NM\_003265.2:37  
NM\_014176.1:50  
NM\_015366.3:1635  
NM\_002309.4:3740  
NM\_001790.4:1056  
NM\_001071.1:395  
NM\_000214.2:3509  
NM\_000057.3:1434  
NM\_001283012.1:1141  
NM\_001428.3:782  
NM\_001040023.1:3355  
NM\_145902.2:906  
NM\_005504.6:1060  
NM\_007019.2:445  
NM\_003804.3:1304  
NM\_001964.2:2034  
NM\_001777.3:901  
NM\_001320635.1:753  
NM\_001330437.1:228
