# Supplementary material for: Long-Term Follow-Up of Gemogenovatucel-T (Vigil) Survival and Molecular Signals of Immune Response in Recurrent Ovarian Cancer
Source: Vaccines (Basel). 2021 Aug 12;9(8):894. doi: 10.3390/vaccines9080894 (PMC8402348; doi:10.3390/vaccines9080894)
Supplement: Supplementary file 1 [file vaccines-09-00894-s001.zip › vaccines-1279453 after proof supl.pdf]

Supplemental File 1 Table S1. Immune Pathway Results

| Sample                  | FANG-OV-1049     | FANG-OV-1086     | FANG-OV-1107     | FANG-OV-1122     |
|-------------------------|------------------|------------------|------------------|------------------|
| TIS status              | TIS-high         | TIS-high         | TIS-high         | TIS-high         |
| ELISPOT status          | ELISPOT-positive | ELISPOT-positive | ELISPOT-positive | ELISPOT-positive |
| Response status         | GR               | GR               | GR               | PR               |
| TIS                     | 8.062            | 8.021            | 7.279            | 8.489            |
| APM                     | 5.824            | 6.156            | 5.465            | 6.042            |
| Apoptosis               | 5.366            | 4.701            | 5.011            | 4.447            |
| ARG1                    | 3.438            | 0.3919           | 3.793            | 1.097            |
| B Cells                 | 7.677            | 4.058            | 6.887            | 6.016            |
| B7-H3                   | 3.939            | 5.603            | 4.728            | 4.311            |
| CD45                    | 6.156            | 5.976            | 6.249            | 5.58             |
| CD8 T Cells             | 6.224            | 5.395            | 5.931            | 5.47             |
| CTLA4                   | 9.135            | 7.474            | 9.179            | 8.761            |
| Cytotoxic Cells         | 6.945            | 7.328            | 7.361            | 7.004            |
| Cytotoxicity            | 6.738            | 6.975            | 7.387            | 7.232            |
| DC                      | 5.59             | 4.156            | 4.326            | 3.278            |
| Endothelial Cells       | 4.302            | 2.546            | 3.563            | 0.9151           |
| Exhausted CD8           | 7.106            | 6.8              | 7.151            | 6.557            |
| Glycolytic Activity     | 5.466            | 4.903            | 5.652            | 4.994            |
| Hypoxia                 | 5.359            | 4.113            | 6.515            | 4.721            |
| IDO1                    | 6.443            | 5.713            | 3.238            | 7.331            |
| IFN Downstream          | 5.859            | 7.087            | 5.272            | 6.838            |
| IFN Gamma               | 7.81             | 8.239            | 6.497            | 8.635            |
| IL10                    | 8.358            | 3.547            | 7.364            | 5.331            |
| Immunoproteasome        | 6.132            | 5.85             | 4.454            | 5.85             |
| Inflammatory Chemokines | 5.933            | 6.438            | 6.341            | 6.876            |
| Lymphoid                | 6.841            | 6.717            | 6.745            | 6.517            |
| Macrophages             | 5.619            | 6.48             | 5.583            | 5.566            |
| MAGEs                   | 1.615            | -0.9018          | 1.255            | -1.045           |
| Mast Cells              | 3.374            | 0.6088           | 3.751            | 1.448            |
| MHC2                    | 7.248            | 6.49             | 6.13             | 5.959            |
| Myeloid                 | 6.043            | 5.908            | 5.833            | 5.516            |
| Myeloid Inflammation    | 4.41             | 2.765            | 4.266            | 2.969            |
| Neutrophils             | 5.946            | 4.601            | 5.316            | 4.134            |
| NK CD56dim              | 6.007            | 4.428            | 6.49             | 4.453            |
| NK Cells                | 7.458            | 6.796            | 6.702            | 5.767            |
| NOS2                    | 3.818            | 0.09464          | 0.9109           | 0.4376           |
| PD-1                    | 6.75             | 5.2              | 5.95             | 5.534            |
| PD-L1                   | 4.979            | 4.809            | 4.949            | 4.553            |
| PD-L2                   | 6.204            | 5.755            | 6.088            | 5.618            |
| Proliferation           | 6.439            | 4.401            | 6.051            | 7.211            |
| Stroma                  | 2.979            | 1.848            | 3.203            | 1.294            |
| T Cells                 | 6.624            | 6.763            | 7.04             | 6.093            |
| TGF-Beta                | 6.348            | 4.806            | 4.039            | 3.56             |
| TH1 Cells               | 6.975            | 5.667            | 6.706            | 4.077            |
| TIGIT                   | 6.896            | 6.026            | 7.614            | 7.094            |
| Treg                    | 5.101            | 4.963            | 7.653            | 5.913            |

| FANG-116         | FANG-OV-1021     | FANG-OV-1024     | FANG-OV-1025     | FANG-OV-1091     |
|------------------|------------------|------------------|------------------|------------------|
| TIS-high         | TIS-high         | TIS-high         | TIS-high         | TIS-low          |
| ELISPOT-positive | ELISPOT-positive | ELISPOT-negative | ELISPOT-positive | ELISPOT-positive |
| GR               | GR               | GR               | PR               | GR               |
| 9.329            | 7.86             | 6.309            | 9.421            | 5.508            |
| 6.7              | 6.404            | 4.387            | 6.88             | 4.71             |
| 4.292            | 5.437            | 3.885            | 4.752            | 3.732            |
| 1.183            | -0.2895          | -1.557           | 1.571            | -0.1266          |
| 6.816            | 5.078            | 3.844            | 8.504            | 3.974            |
| 4.301            | 4.442            | 3.357            | 4.152            | 5.354            |
| 6.719            | 5.28             | 4.083            | 7.612            | 3.955            |
| 6.142            | 5.655            | 3.732            | 6.402            | 2.905            |
| 9.103            | 9.003            | 6.463            | 9.906            | 5.156            |
| 7.367            | 7.056            | 5.737            | 8.436            | 3.991            |
| 7.25             | 6.892            | 5.755            | 8.161            | 4.14             |
| 4.712            | 2.797            | 3.356            | 4.072            | 2.684            |
| 1.282            | 1.411            | 1.531            | 2.61             | 1.932            |
| 7.266            | 6.288            | 5.142            | 8.332            | 4.266            |
| 5.77             | 5.579            | 5.123            | 4.663            | 5.134            |
| 5.431            | 5.13             | 5.111            | 3.981            | 5.124            |
| 7.553            | 7.47             | 2.829            | 7.342            | 3.696            |
| 7.267            | 5.666            | 5.701            | 7.914            | 5.199            |
| 9.522            | 7.648            | 6.58             | 9.725            | 5.227            |
| 5.56             | 5.188            | 5.406            | 8.048            | 4.836            |
| 6.823            | 6.611            | 3.858            | 6.558            | 3.864            |
| 7.31             | 5.339            | 5.892            | 8.274            | 5.127            |
| 7.062            | 6.331            | 4.844            | 7.904            | 4.131            |
| 6.708            | 4.98             | 5.118            | 7.577            | 5.015            |
| -0.3153          | -1.651           | -1.892           | -0.408           | -1.081           |
| 0.3946           | 1.287            | -0.1439          | 1.063            | 1.111            |
| 6.962            | 7.155            | 4.418            | 7.33             | 6.119            |
| 6.099            | 5.543            | 4.413            | 6.594            | 4.904            |
| 3.958            | 5.781            | 2.629            | 4.444            | 3.422            |
| 5.066            | 4.124            | 3.345            | 4.883            | 3.645            |
| 4.268            | 3.748            | 3.502            | 5.613            | 3.315            |
| 6.826            | 6.293            | 5.655            | 8.366            | 4.996            |
| -0.1147          | -1.587           | -0.2689          | 1.689            | 0.161            |
| 5.232            | 4.551            | 3.699            | 6.444            | 2.129            |
| 5.367            | 3.306            | 2.955            | 5.243            | 2.307            |
| 6.527            | 4.941            | 4.635            | 6.801            | 3.75             |
| 6.601            | 5.926            | 6.653            | 4.709            | 5.354            |
| 1.7              | 2.576            | 1.71             | 2.326            | 2.299            |
| 6.972            | 5.91             | 4.236            | 7.858            | 3.611            |
| 4.577            | 3.971            | 2.7              | 5.702            | 2.672            |
| 5.195            | 3.4              | 3.455            | 5.261            | 3.148            |
| 8.452            | 7.579            | 4.929            | 8.29             | 3.555            |
| 6.831            | 6.826            | 3.014            | 7.364            | 4.029            |

| FANG-032         | FANG-037 | FANG-046 |
|------------------|----------|----------|
| TIS-low          | TIS-low  | TIS-low  |
| ELISPOT-negative | n/a      | n/a      |
| PR               | PR       | PR       |
| 4.438            | 5.475    | 5.794    |
| 2.961            | 5.109    | 2.949    |
| 4.19             | 4.337    | 4.119    |
| -1.816           | 0.8422   | 0.02183  |
| 3.585            | 4.778    | 6.321    |
| 5.871            | 4.485    | 4.916    |
| 2.343            | 3.628    | 4.414    |
| 1.613            | 2.3      | 3.465    |
| 4.104            | 4.692    | 7.222    |
| 3.129            | 4.492    | 4.728    |
| 2.973            | 4.151    | 4.442    |
| 2.163            | 1.991    | 1.995    |
| 2.774            | 2.275    | 1.831    |
| 4.11             | 4.573    | 4.786    |
| 5.367            | 6.09     | 5.266    |
| 5.275            | 6.163    | 4.764    |
| 0.5656           | 3.911    | 3.673    |
| 4.251            | 6.27     | 5.217    |
| 3.214            | 5.769    | 4.827    |
| 5.04             | 4.413    | 2.592    |
| 3.017            | 5.927    | 4.792    |
| 3.193            | 4.713    | 4.305    |
| 3.31             | 4.369    | 5.195    |
| 3.154            | 3.744    | 3.367    |
| -0.7829          | -1.473   | -2.132   |
| 0.2674           | 0.1371   | 0.1584   |
| 4.314            | 4.472    | 4.246    |
| 3.221            | 4.463    | 3.24     |
| 1.728            | 4.325    | 1.802    |
| 2.8              | 3.234    | 2.356    |
| 2.679            | 3.034    | 3.256    |
| 2.551            | 5.737    | 4.884    |
| 0.4716           | -0.0401  | -0.8604  |
| 3.118            | 2.776    | 3.956    |
| 1.954            | 3.036    | 3.202    |
| 2.764            | 3.717    | 3.204    |
| 6.084            | 5.197    | 7.012    |
| 2.148            | 1.871    | 1.145    |
| 2.757            | 3.833    | 5.345    |
| 1.593            | 2.344    | 3.202    |
| 4.196            | 3.532    | 3.934    |
| 2.135            | 3.895    | 6.605    |
| 3.492            | 4.243    | 4.745    |
